# Supplementary material for: Pollinators show flower colour preferences but flowers with similar colours do not attract similar pollinators
Source: Oxford University Press journal article supplement (doi:10.1093/aob/mcw103), 2016-06-20
Supplement: aob-15644-s01.doc [file aob-15644-s01.doc]

**Supplementary Information**

**Figure S1.** Phylogenetic tree of the 85 species surveyed. Colour dots represent the colour category of each plant species (see colour legend in Fig. 1).


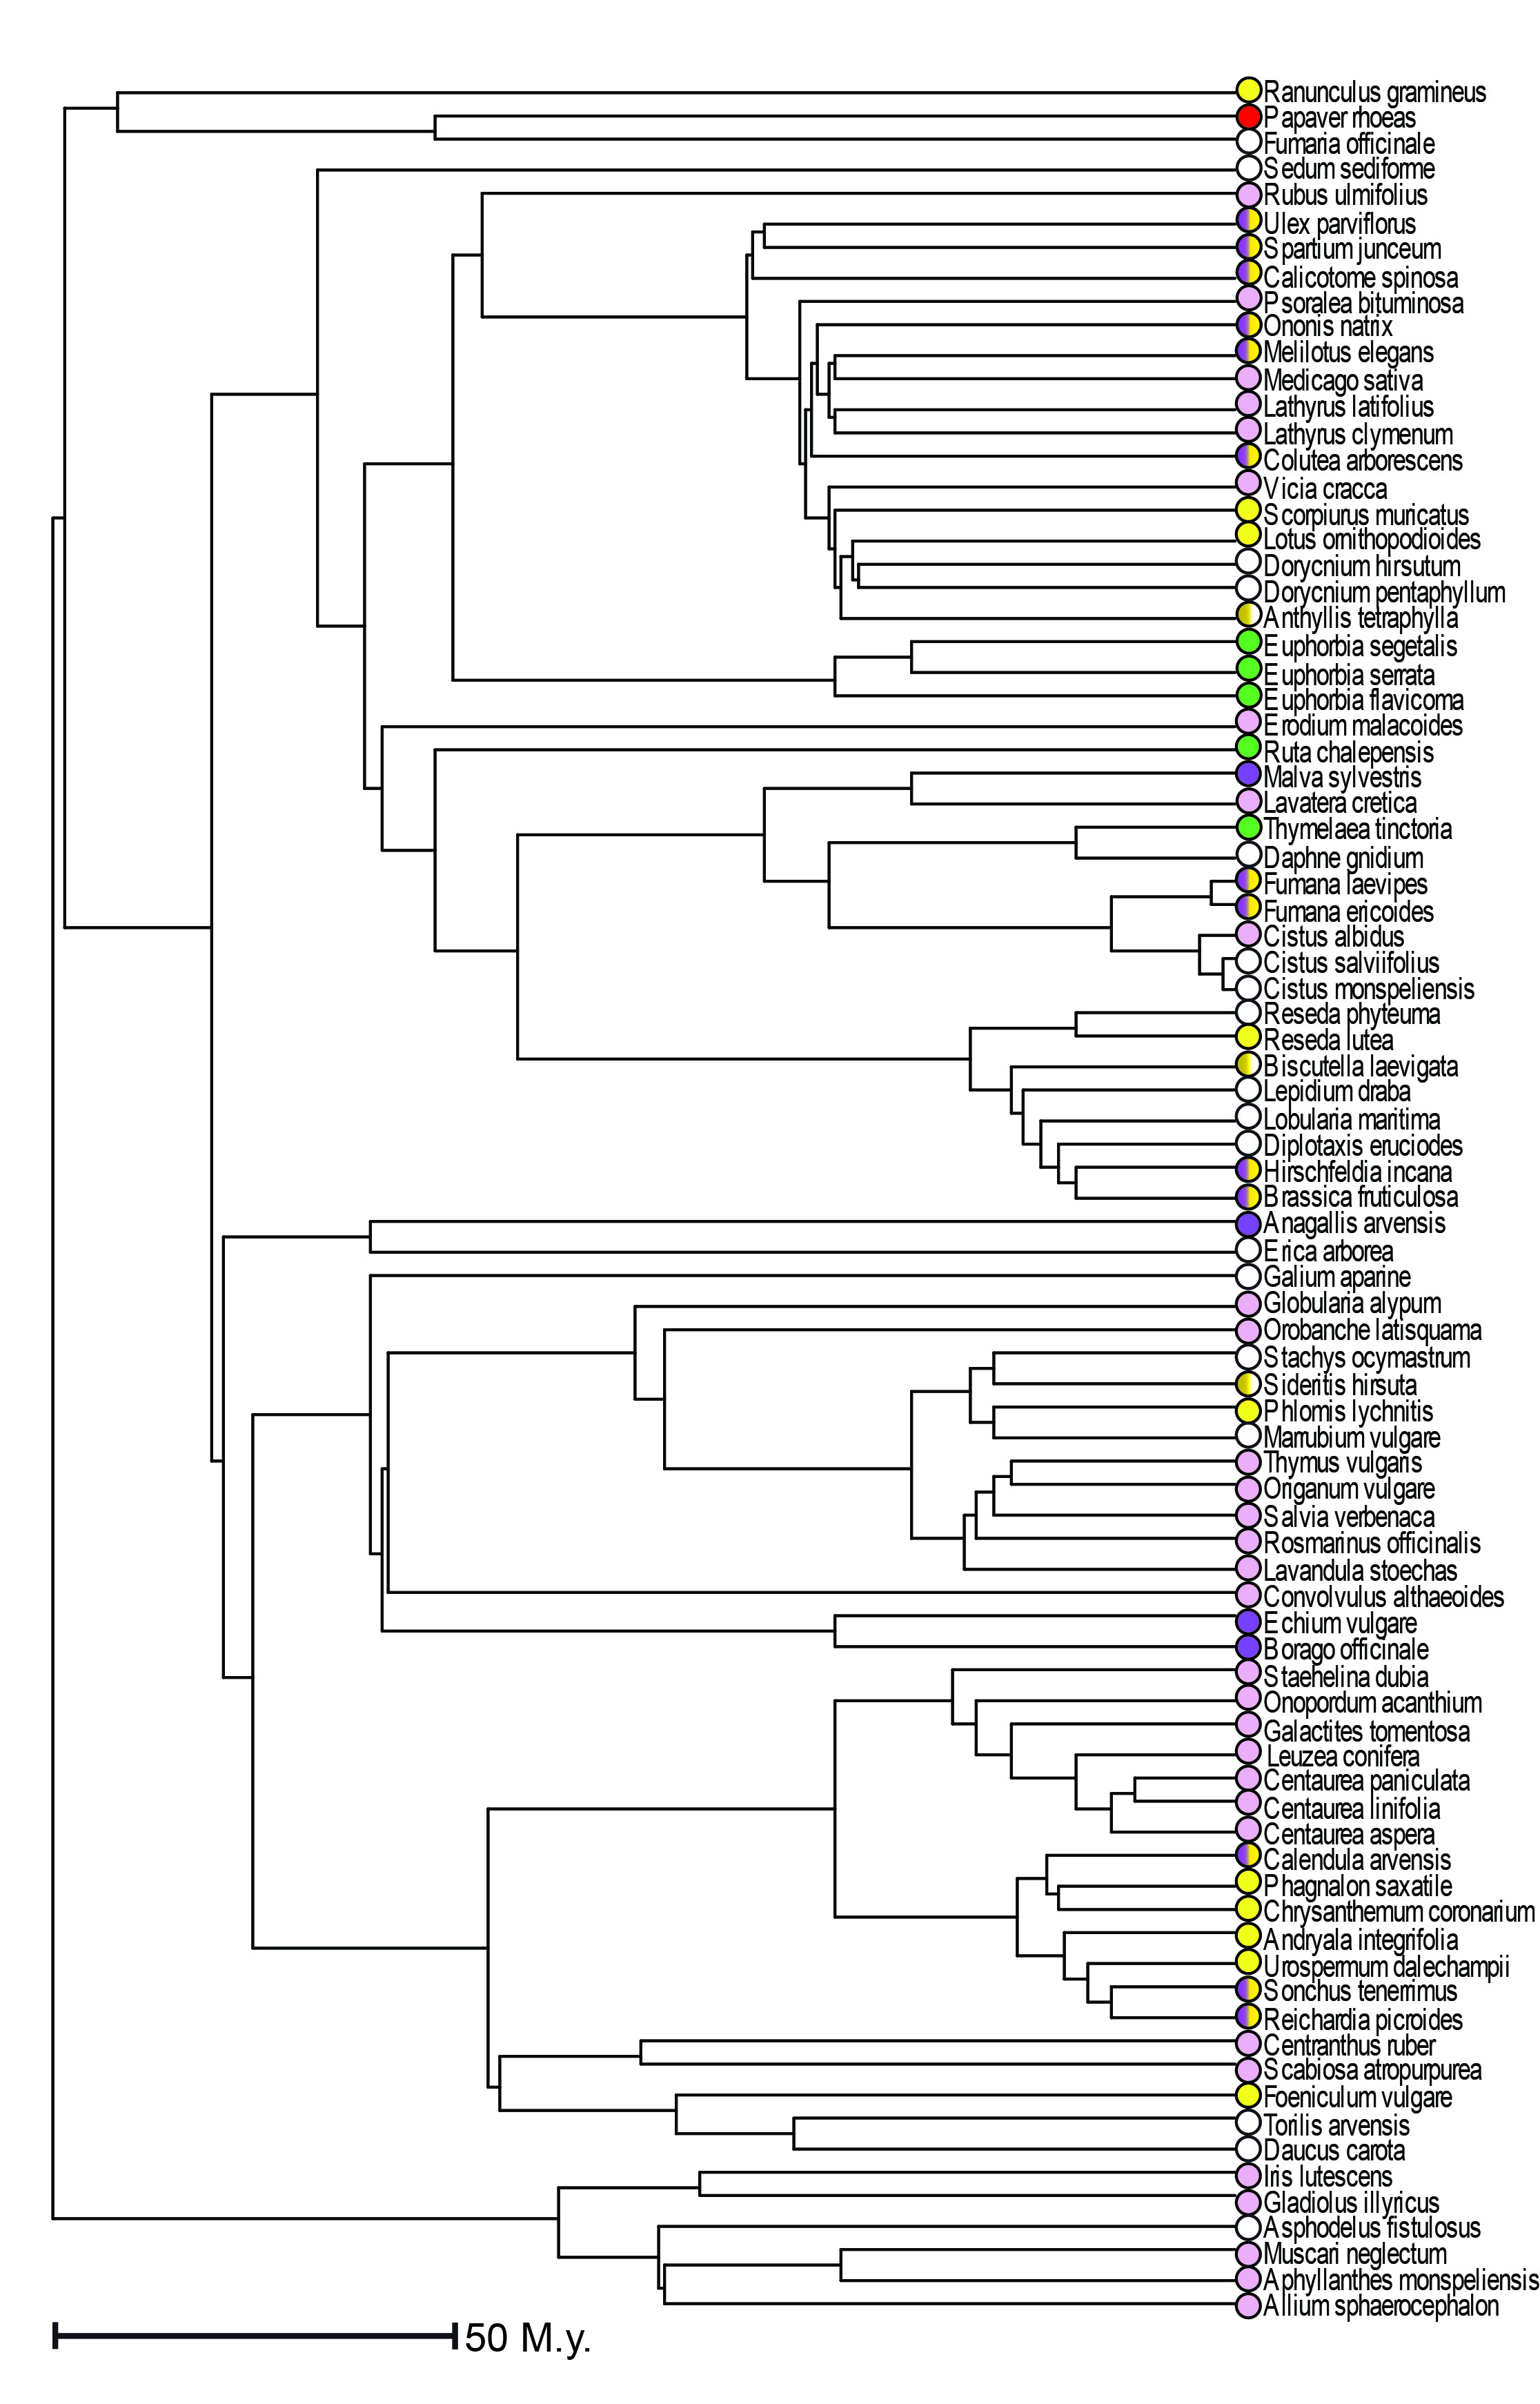


**Table S1.** Percentage of species in each of the four communities (CA, CO, GA, PA) corresponding to the flower colour categories defined by Chittk*a et a*l. (1994) with example species of each category.

| **Colour category** | **Examples** | | **Reflectance spectrum** | **CA** | **CO** | **GA** | **PA** |
| --- | --- | --- | --- | --- | --- | --- | --- |
| **Purple** | *Borago officinalis* 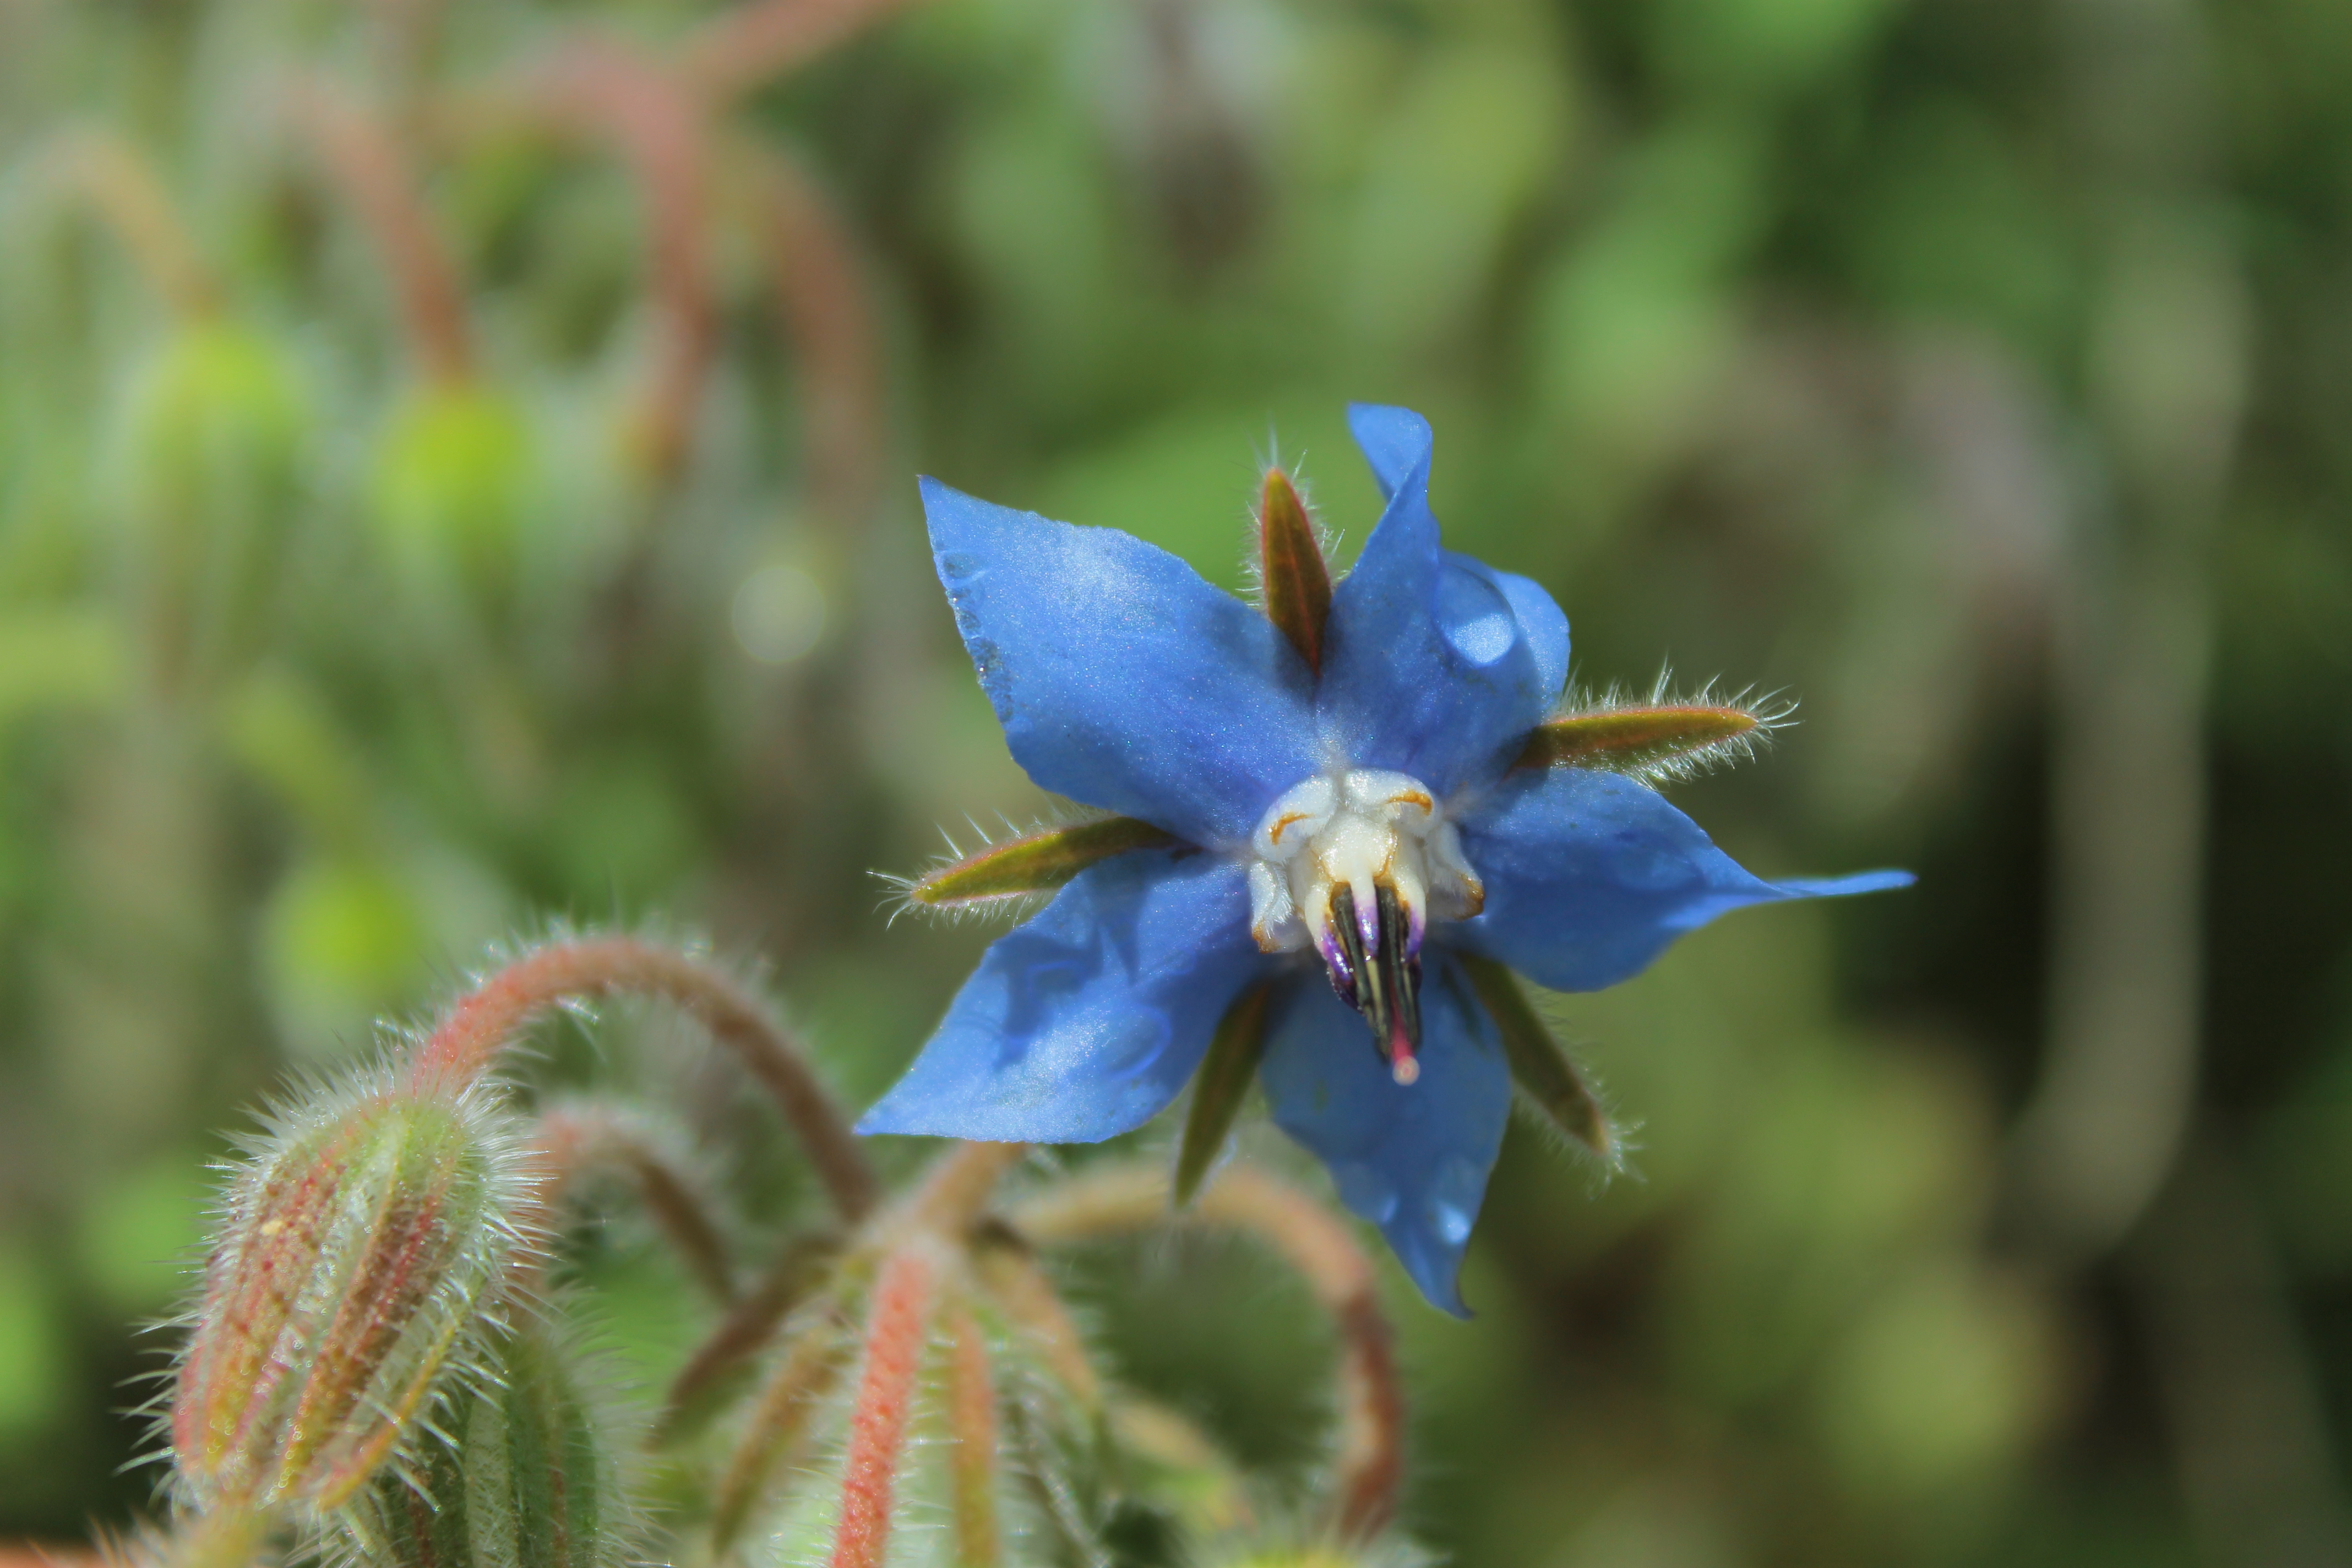 | *Malva* *sylvestris* 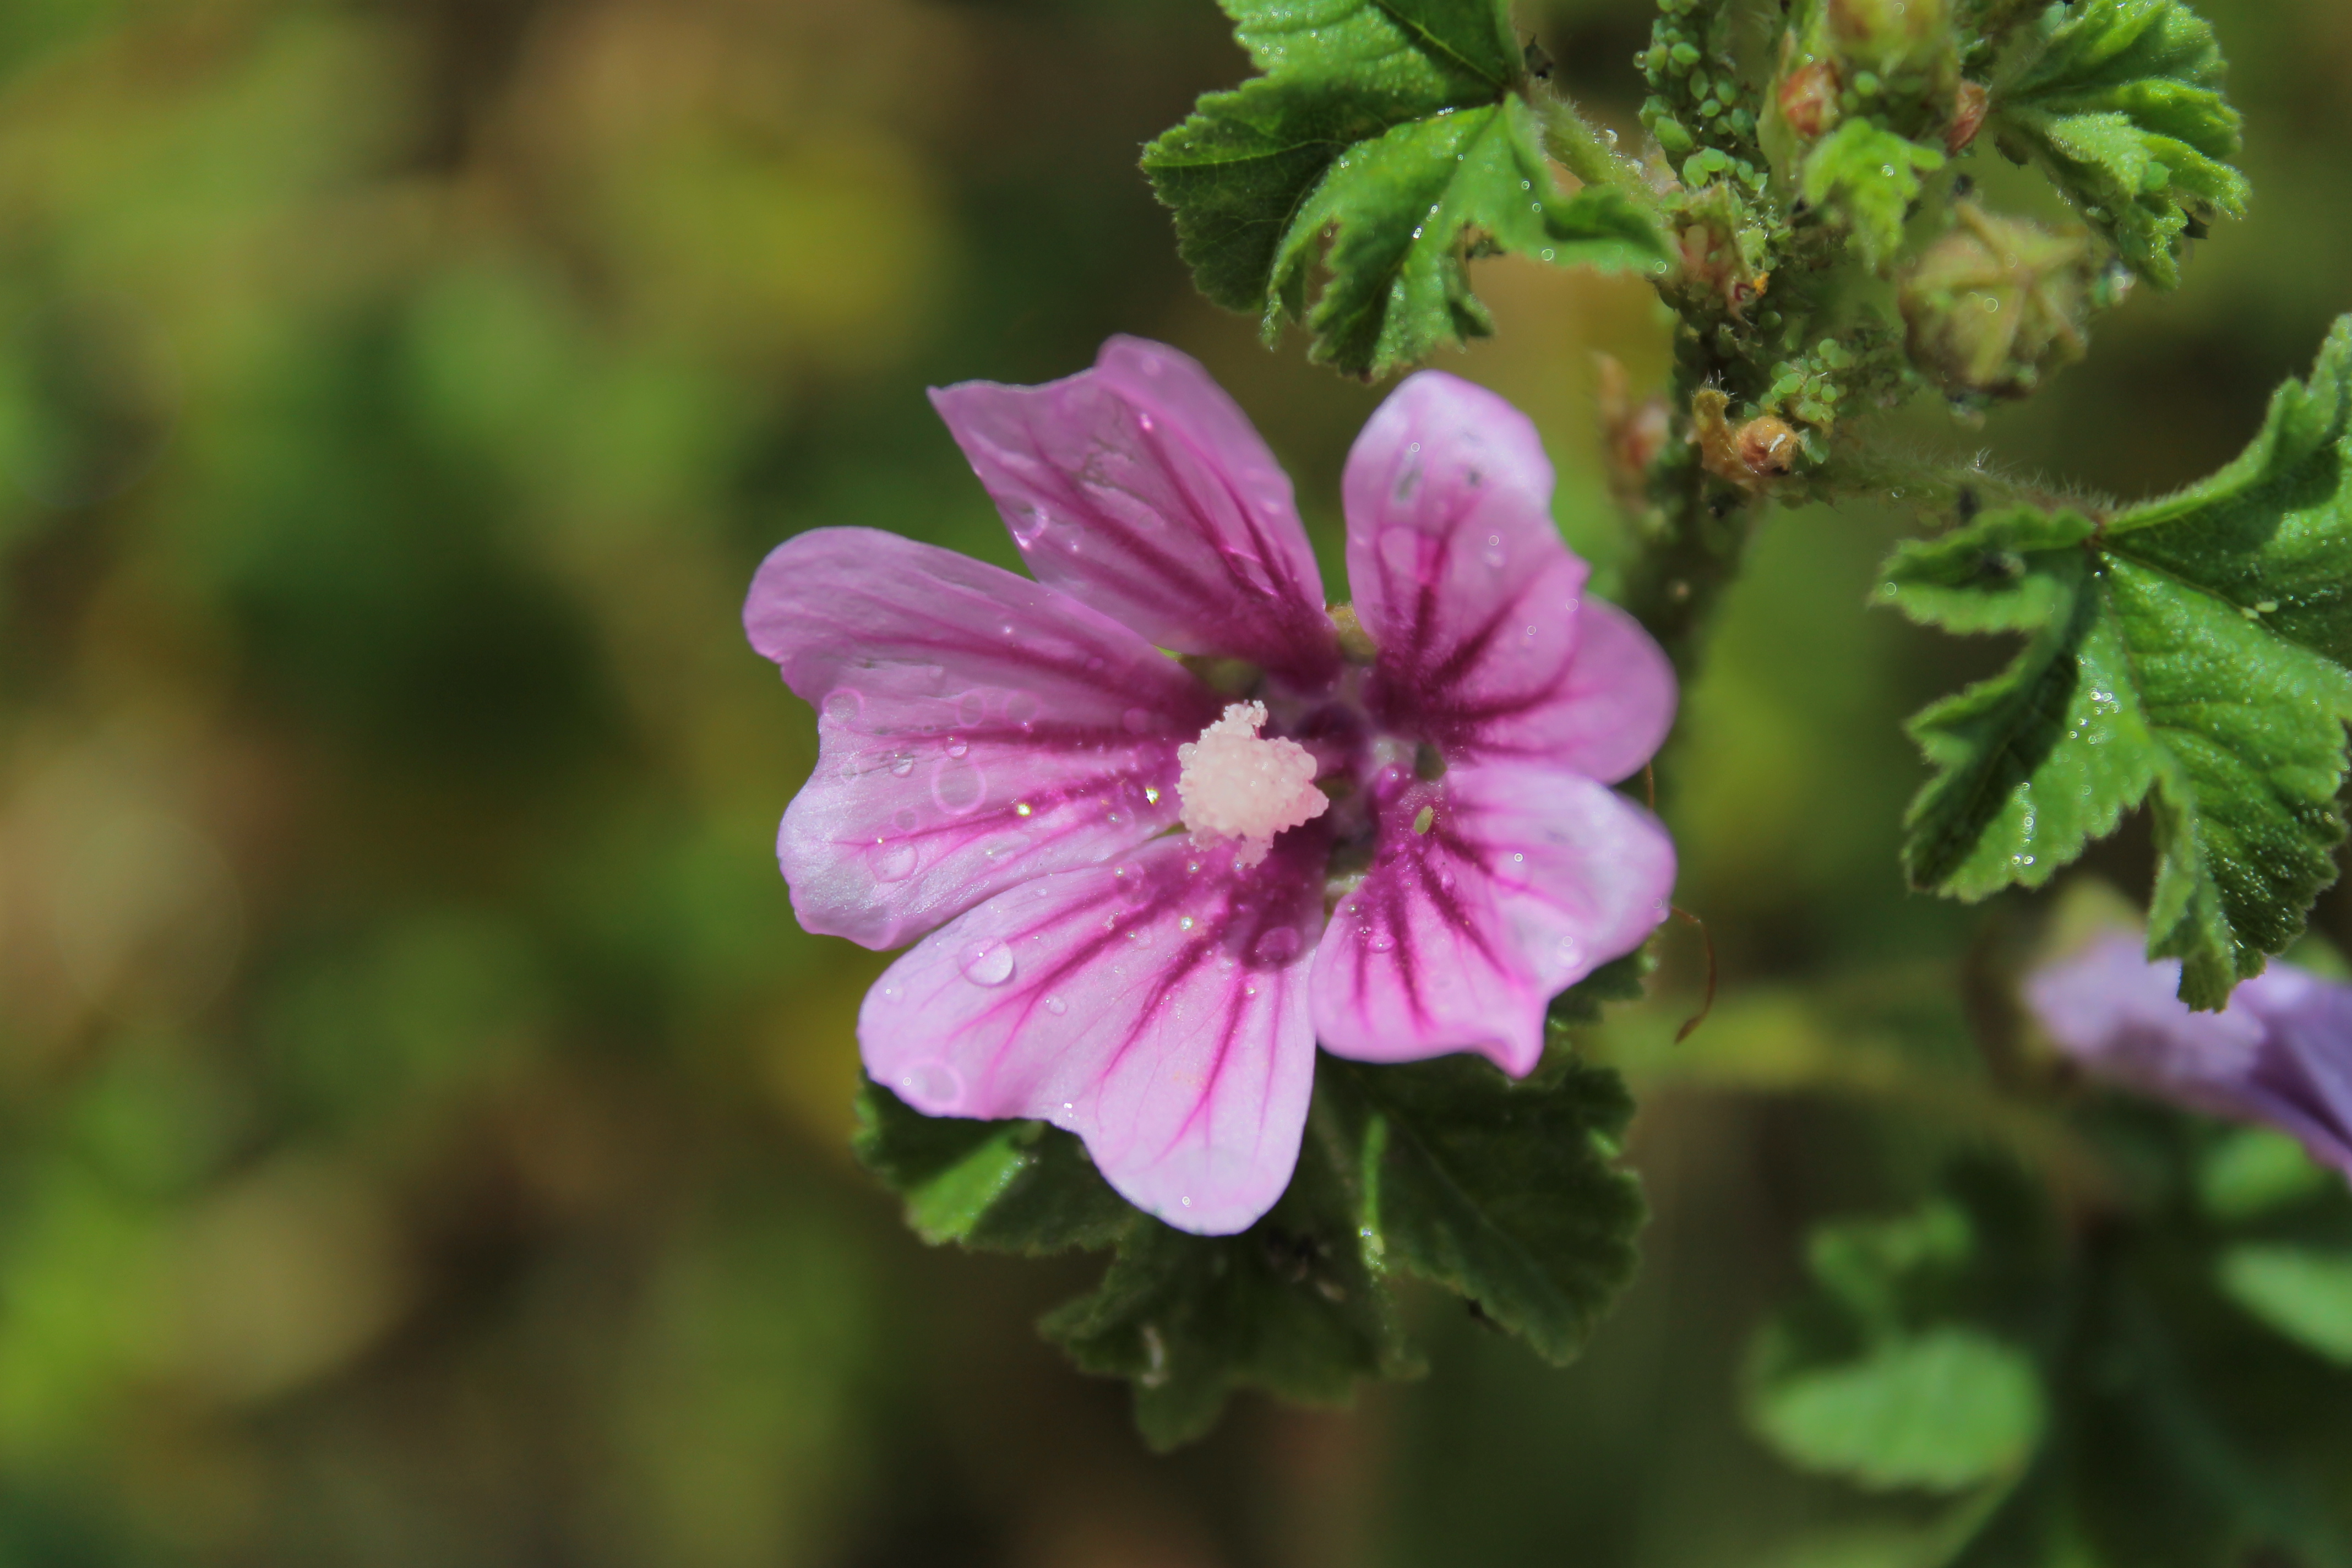 |  | 6% | 9% | 4% | 5% |
| **UV-red** | *Papaver rhoeas*  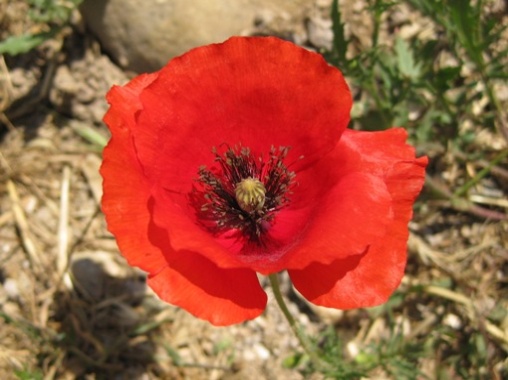 | |  | 6% | 0% | 0% | 0% |
| **UV-yellow** | *Sonchus tenerrimus*  *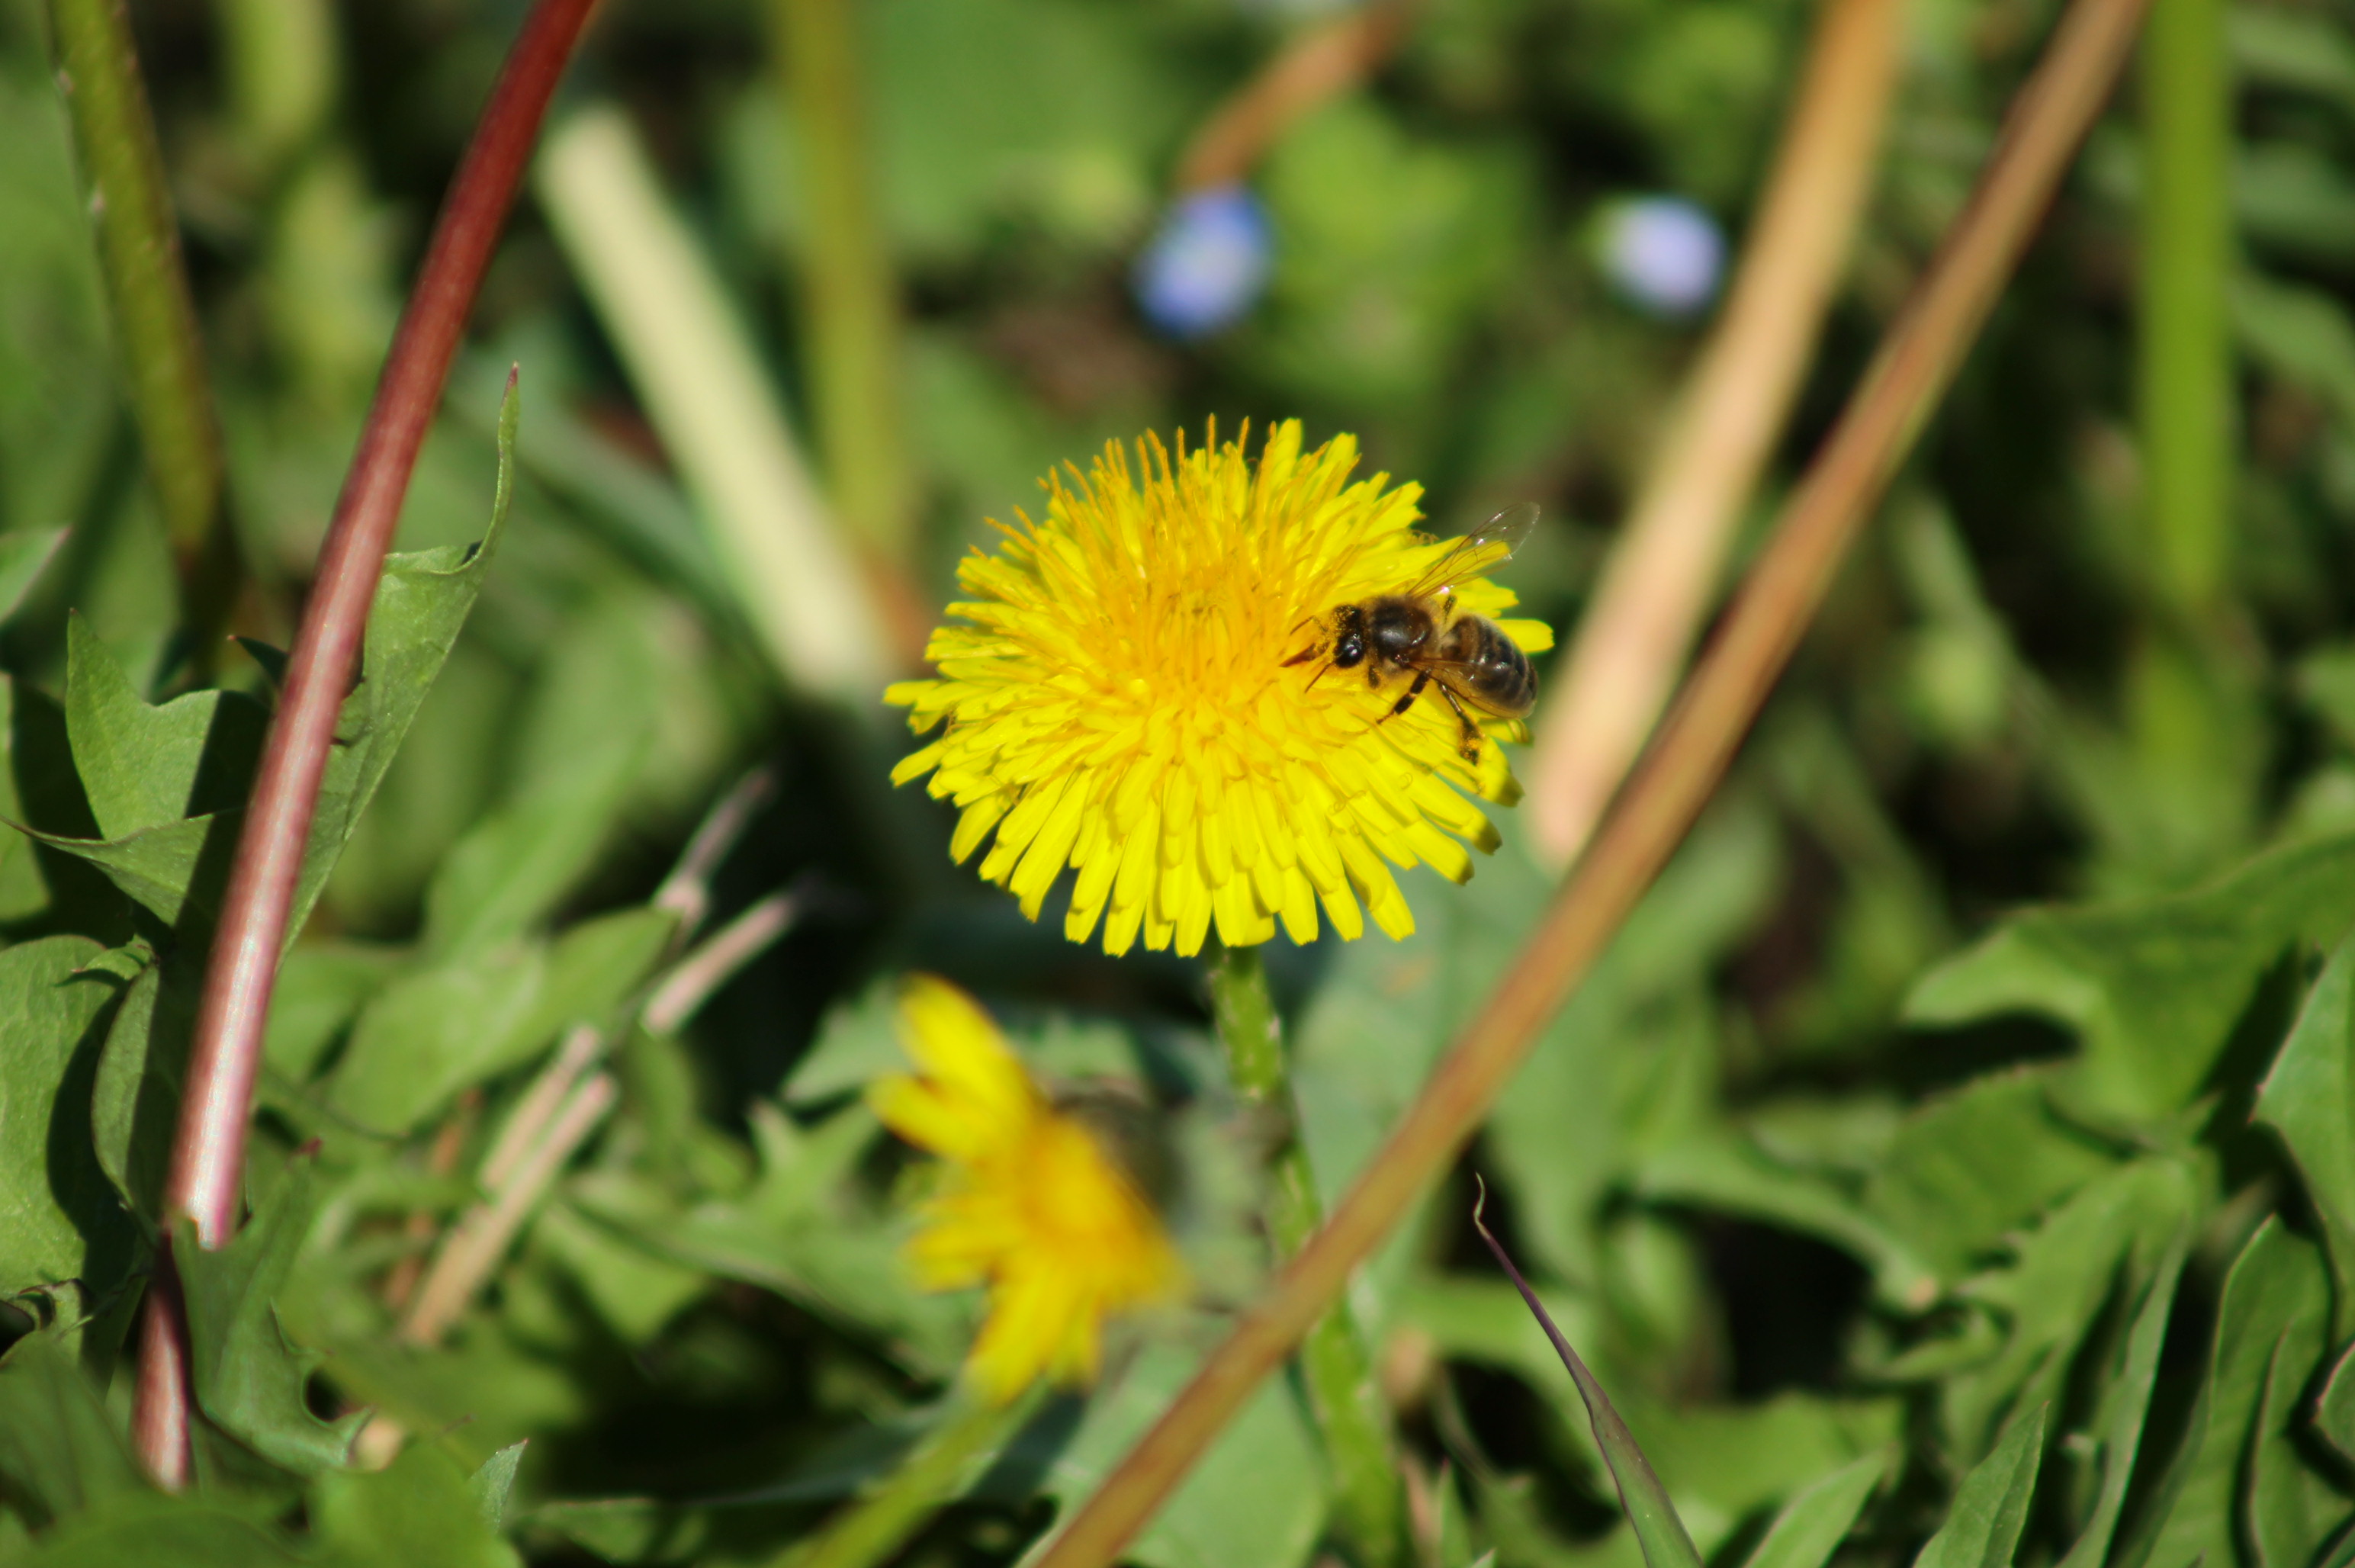* | *Ulex parviflorus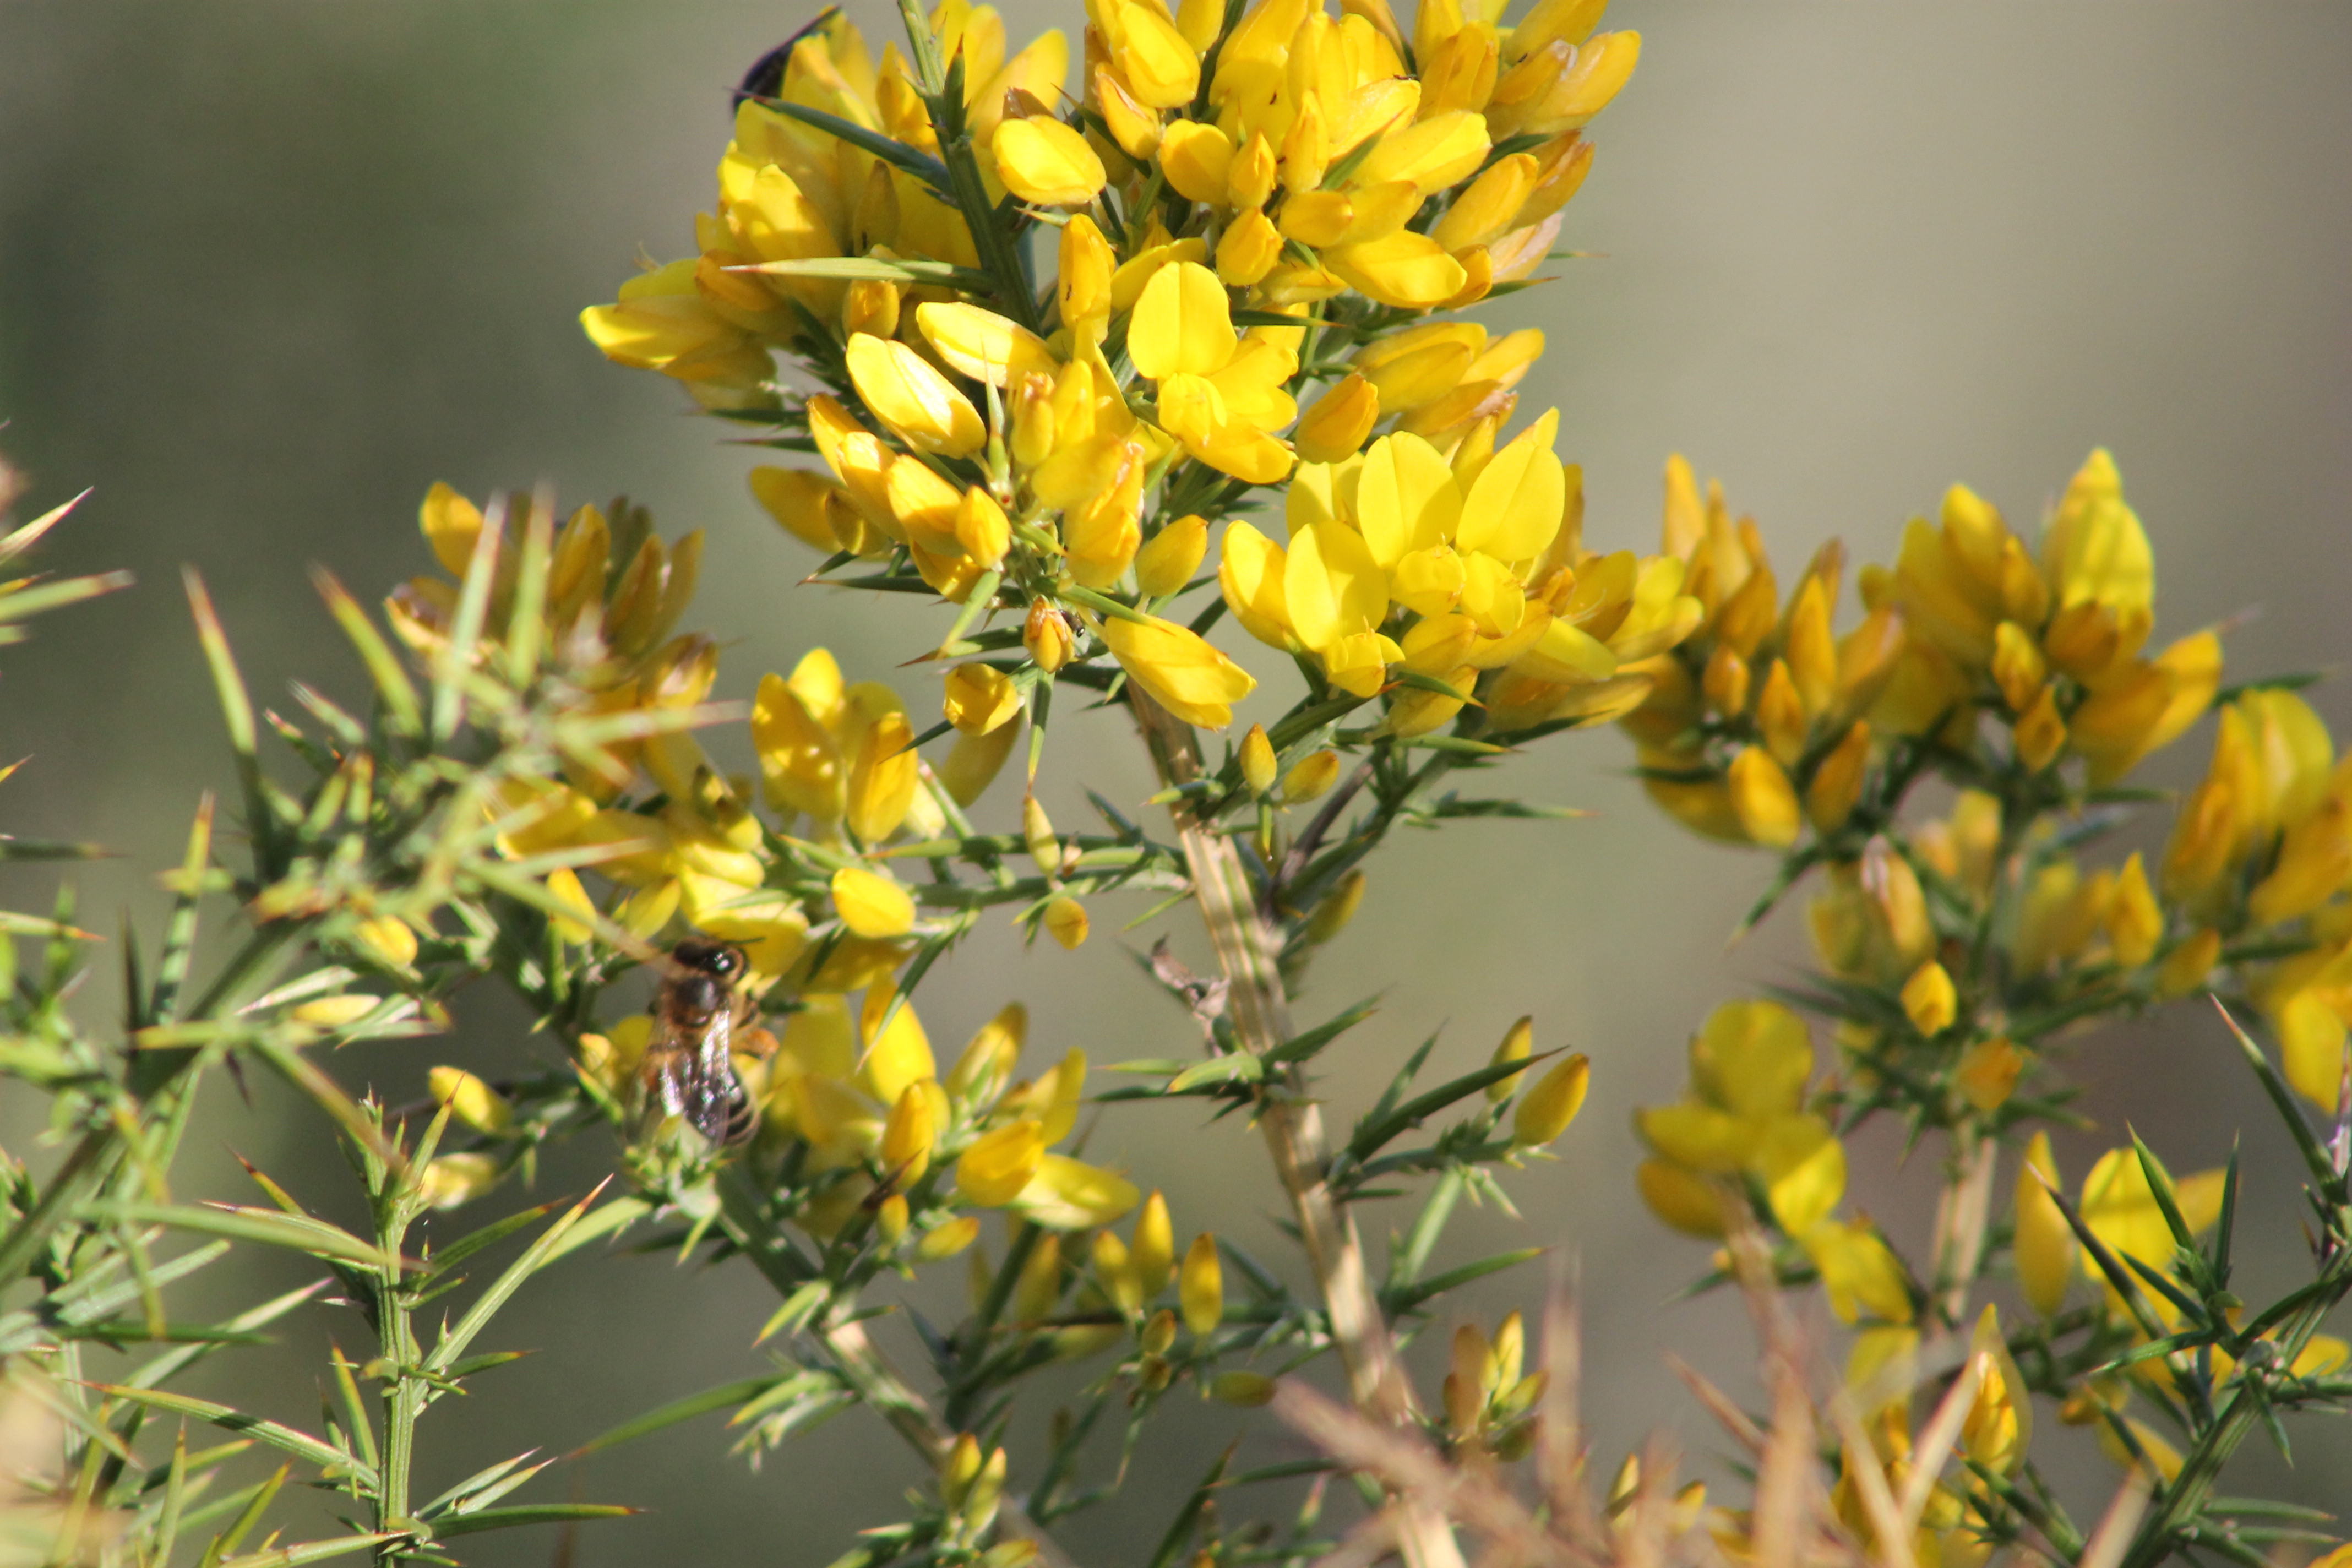* |  | 24% | 17% | 0% | 14% |
| **Yellow** | *Ranunculus gramineus* *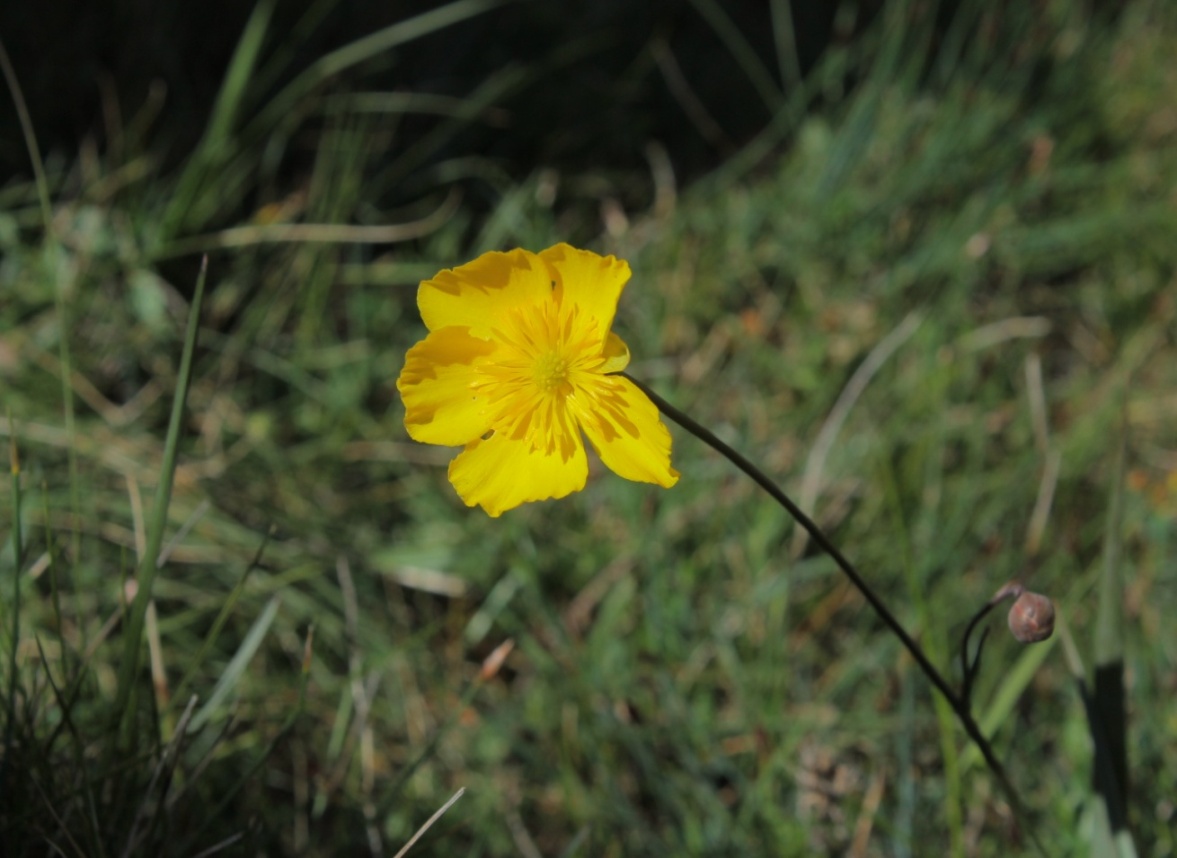* | *Scorpiurus muricatus* 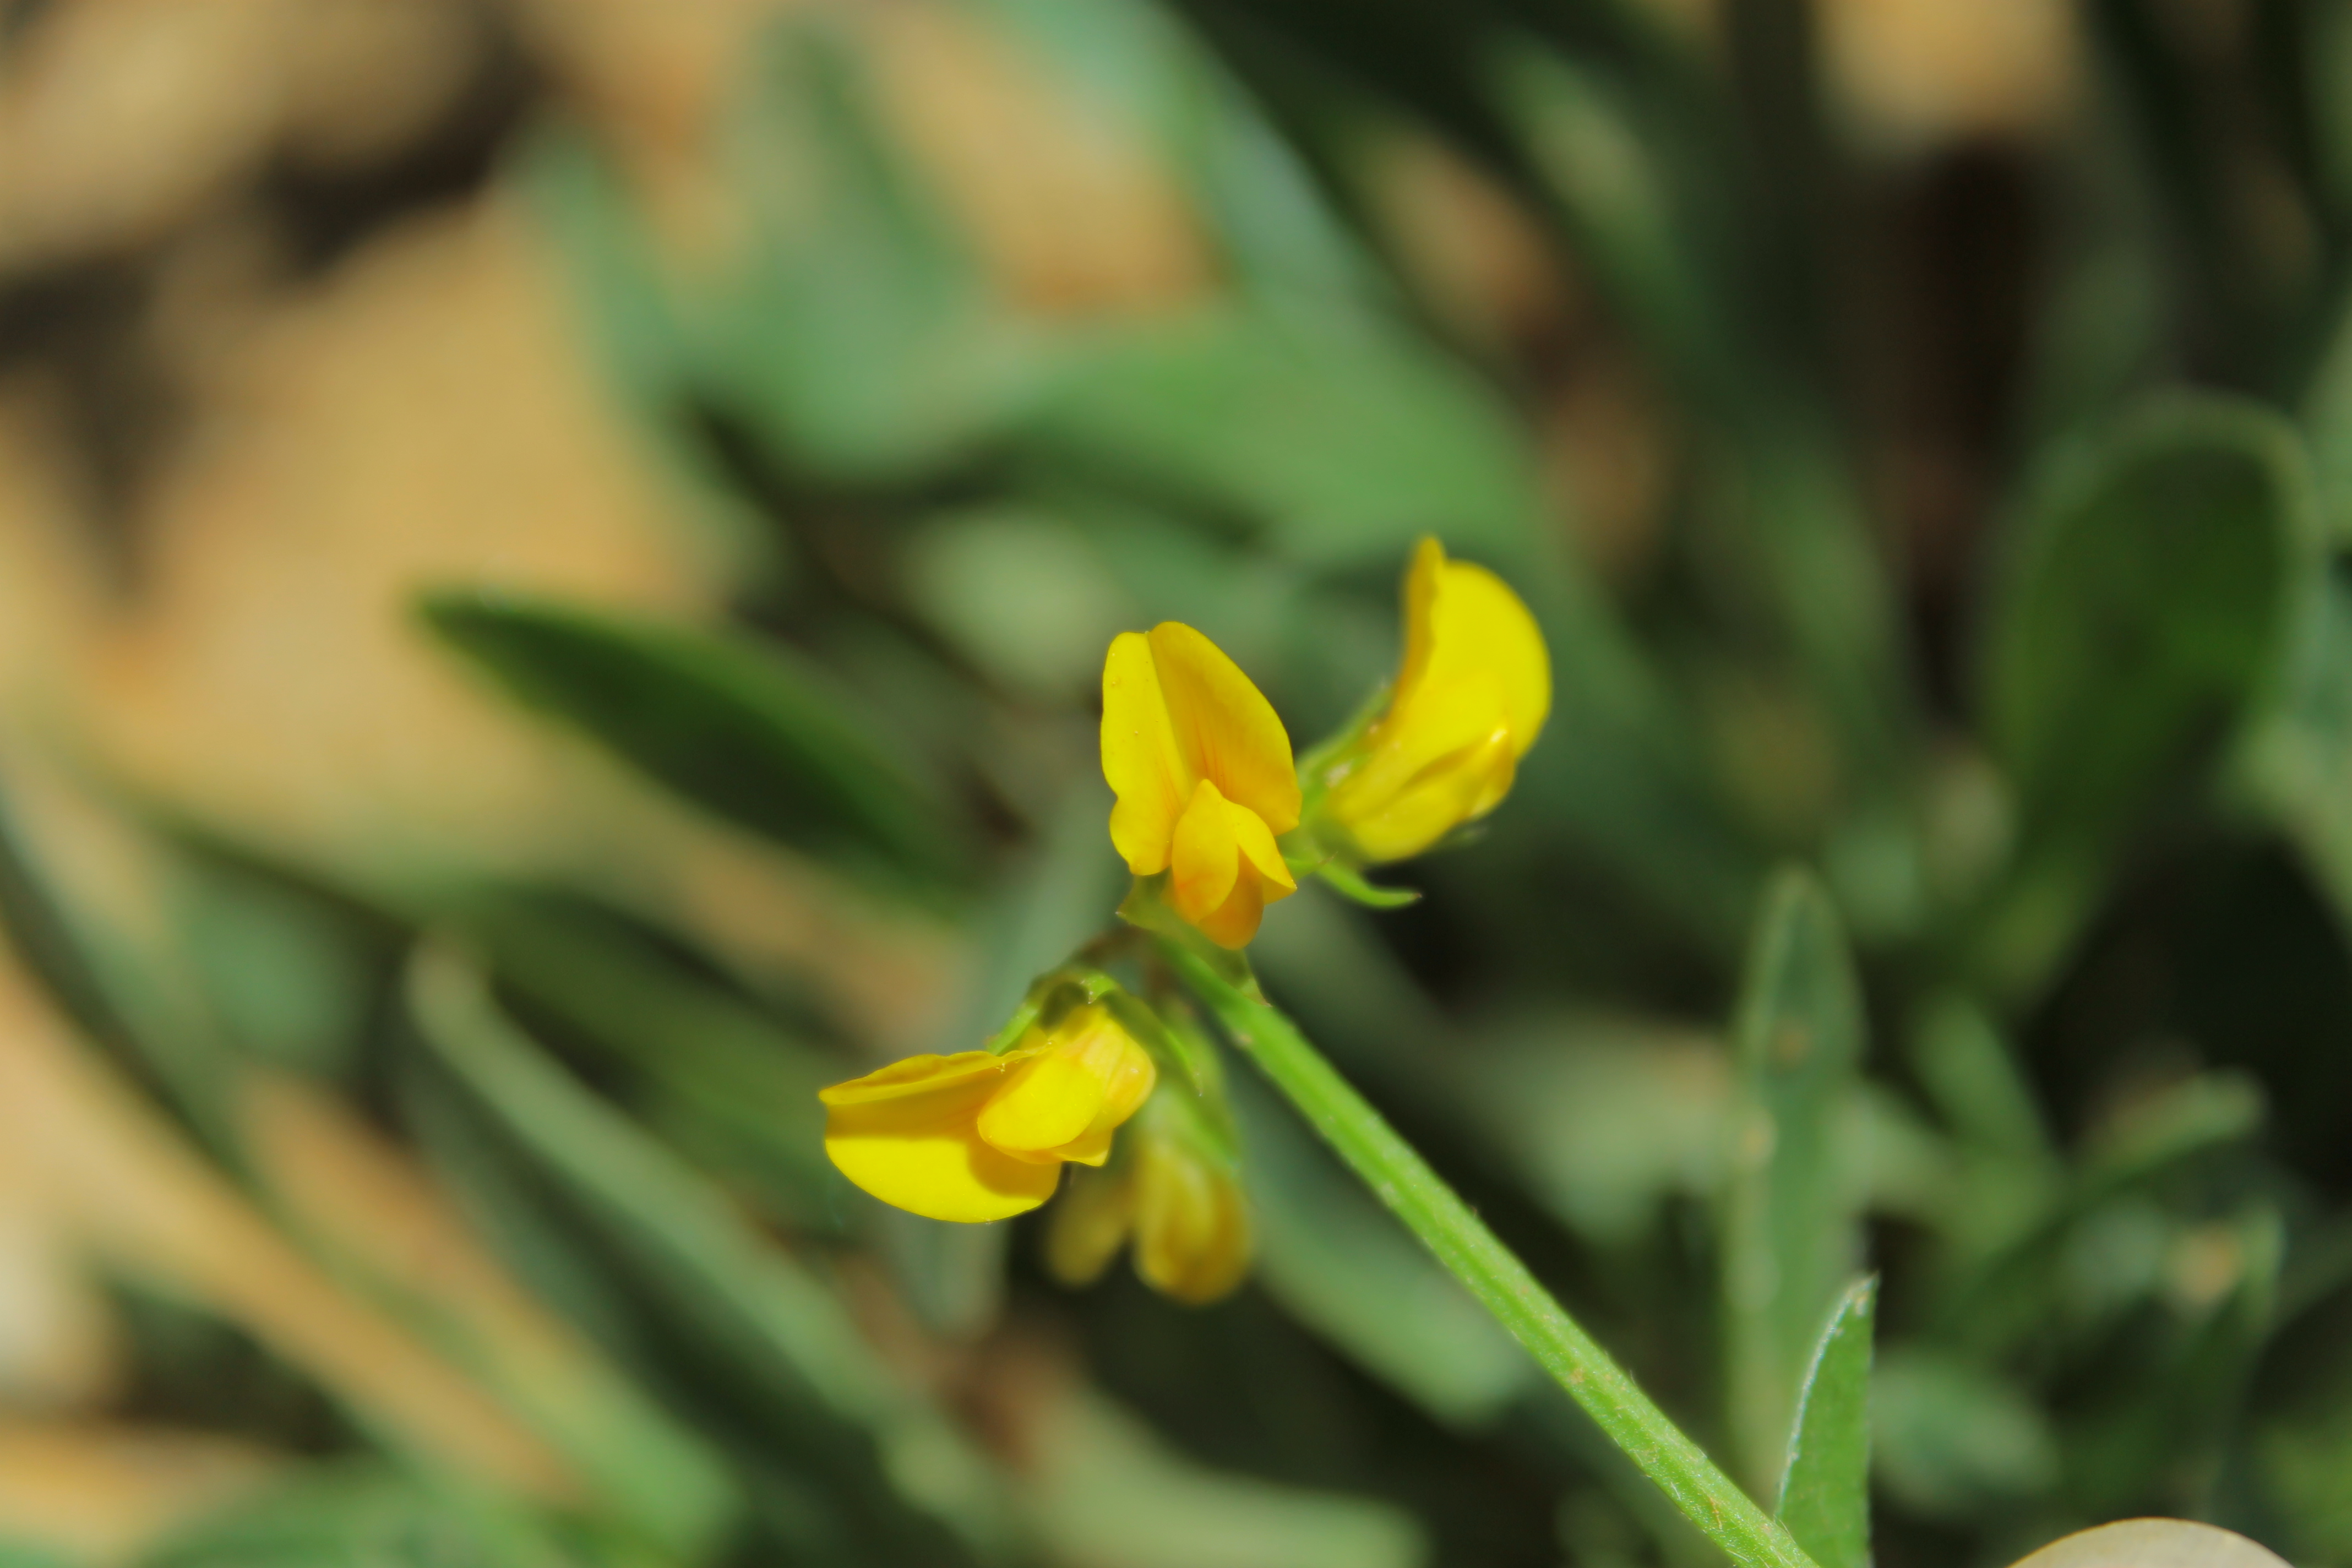 |  | 12% | 15% | 12% | 14% |
| **White-yellow** | *Biscutella laevigata*  *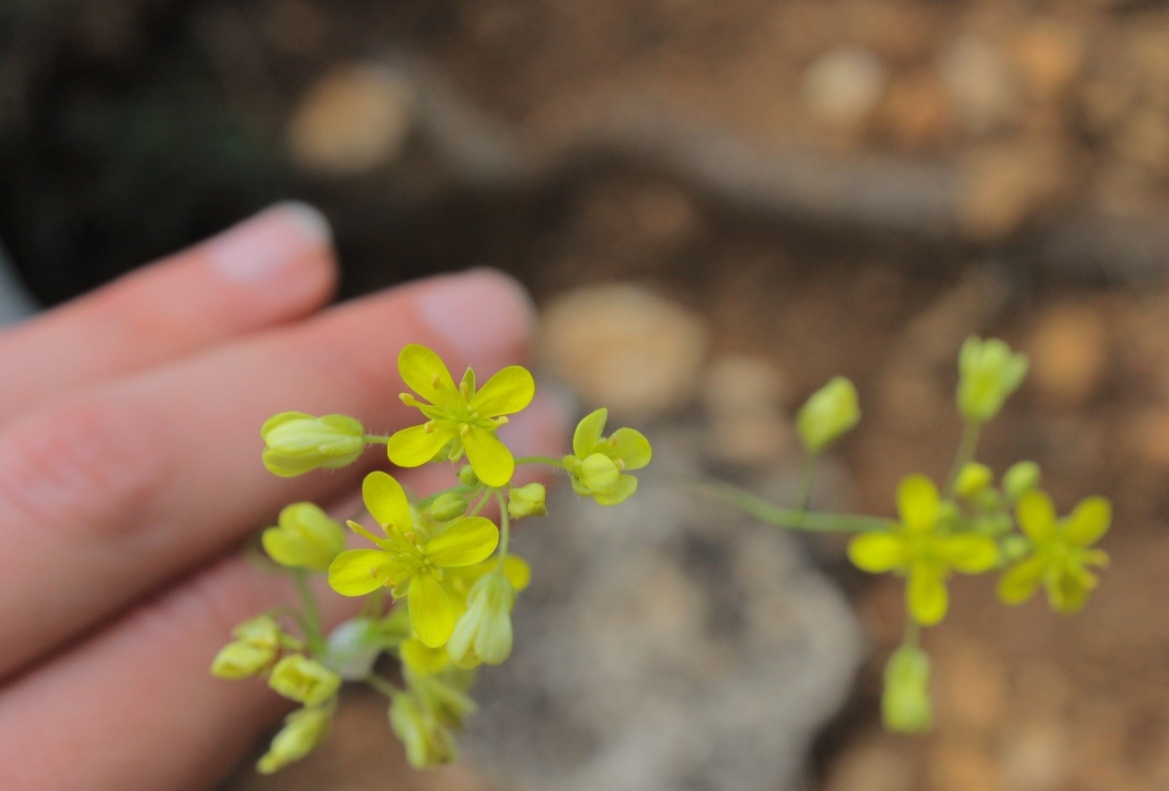* | *Anthyllis tetraphylla 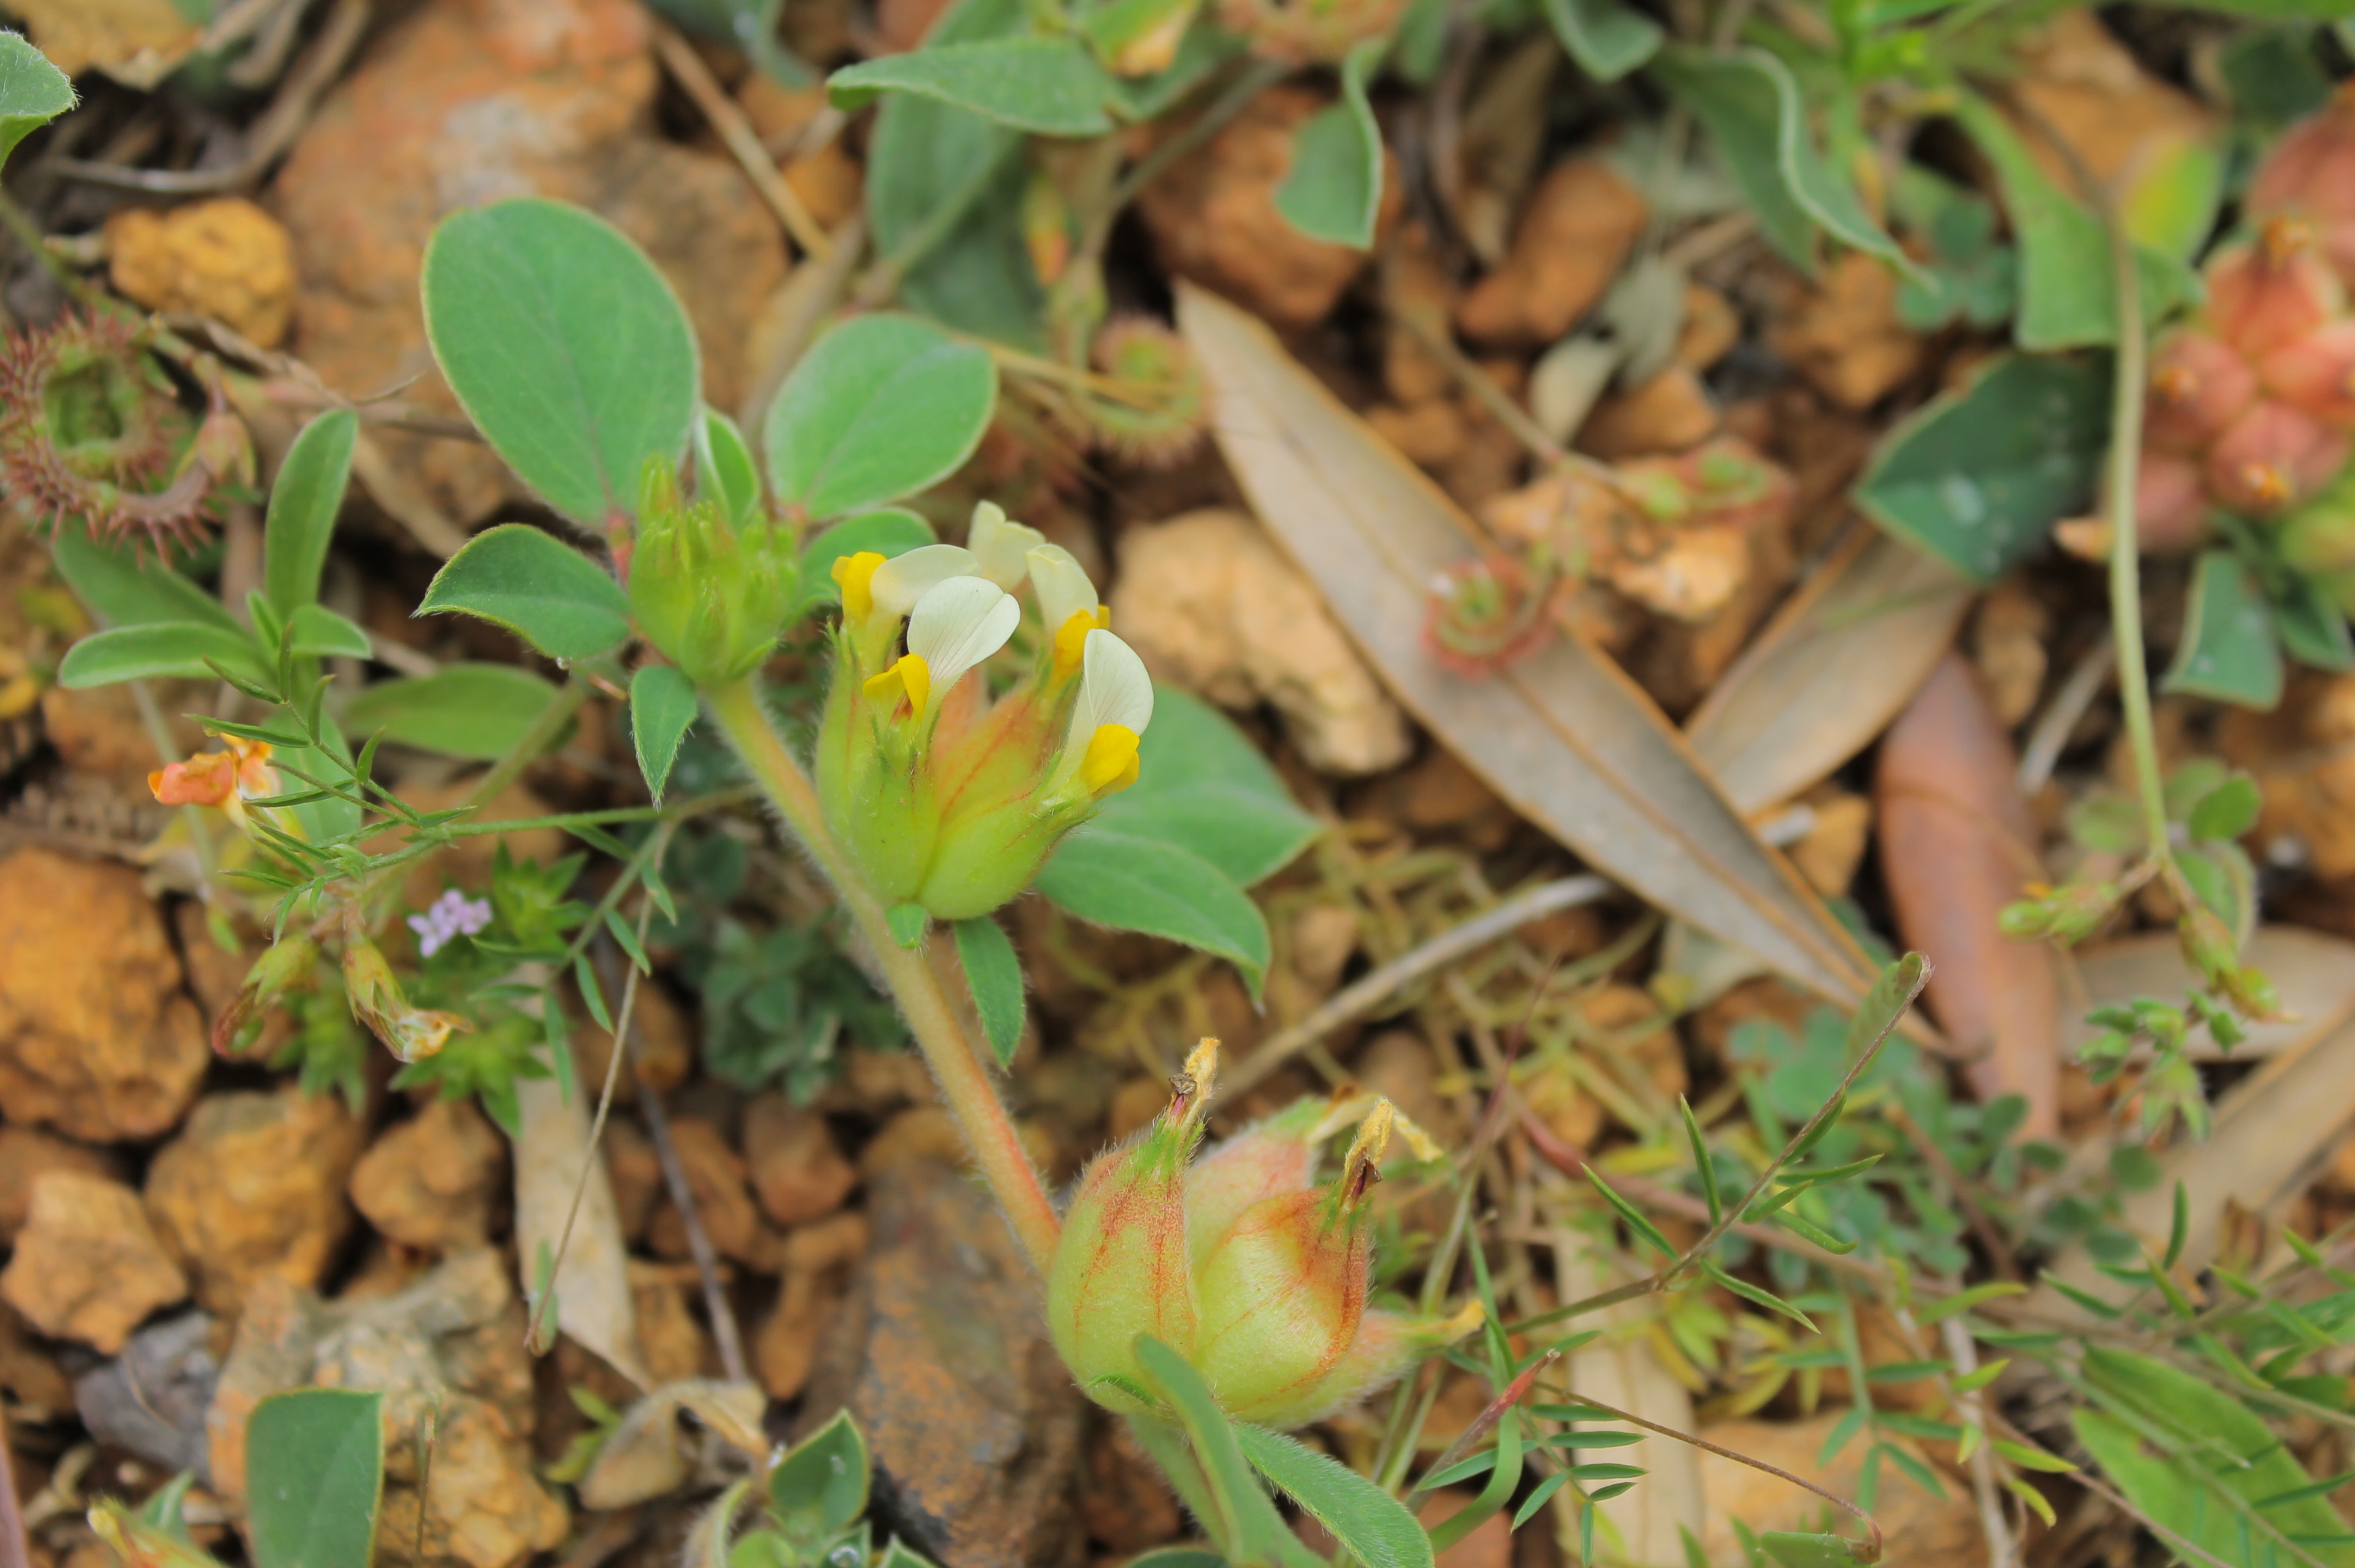* |  | 0% | 2% | 8% | 0% |
| **White** | *Cistus salviifolius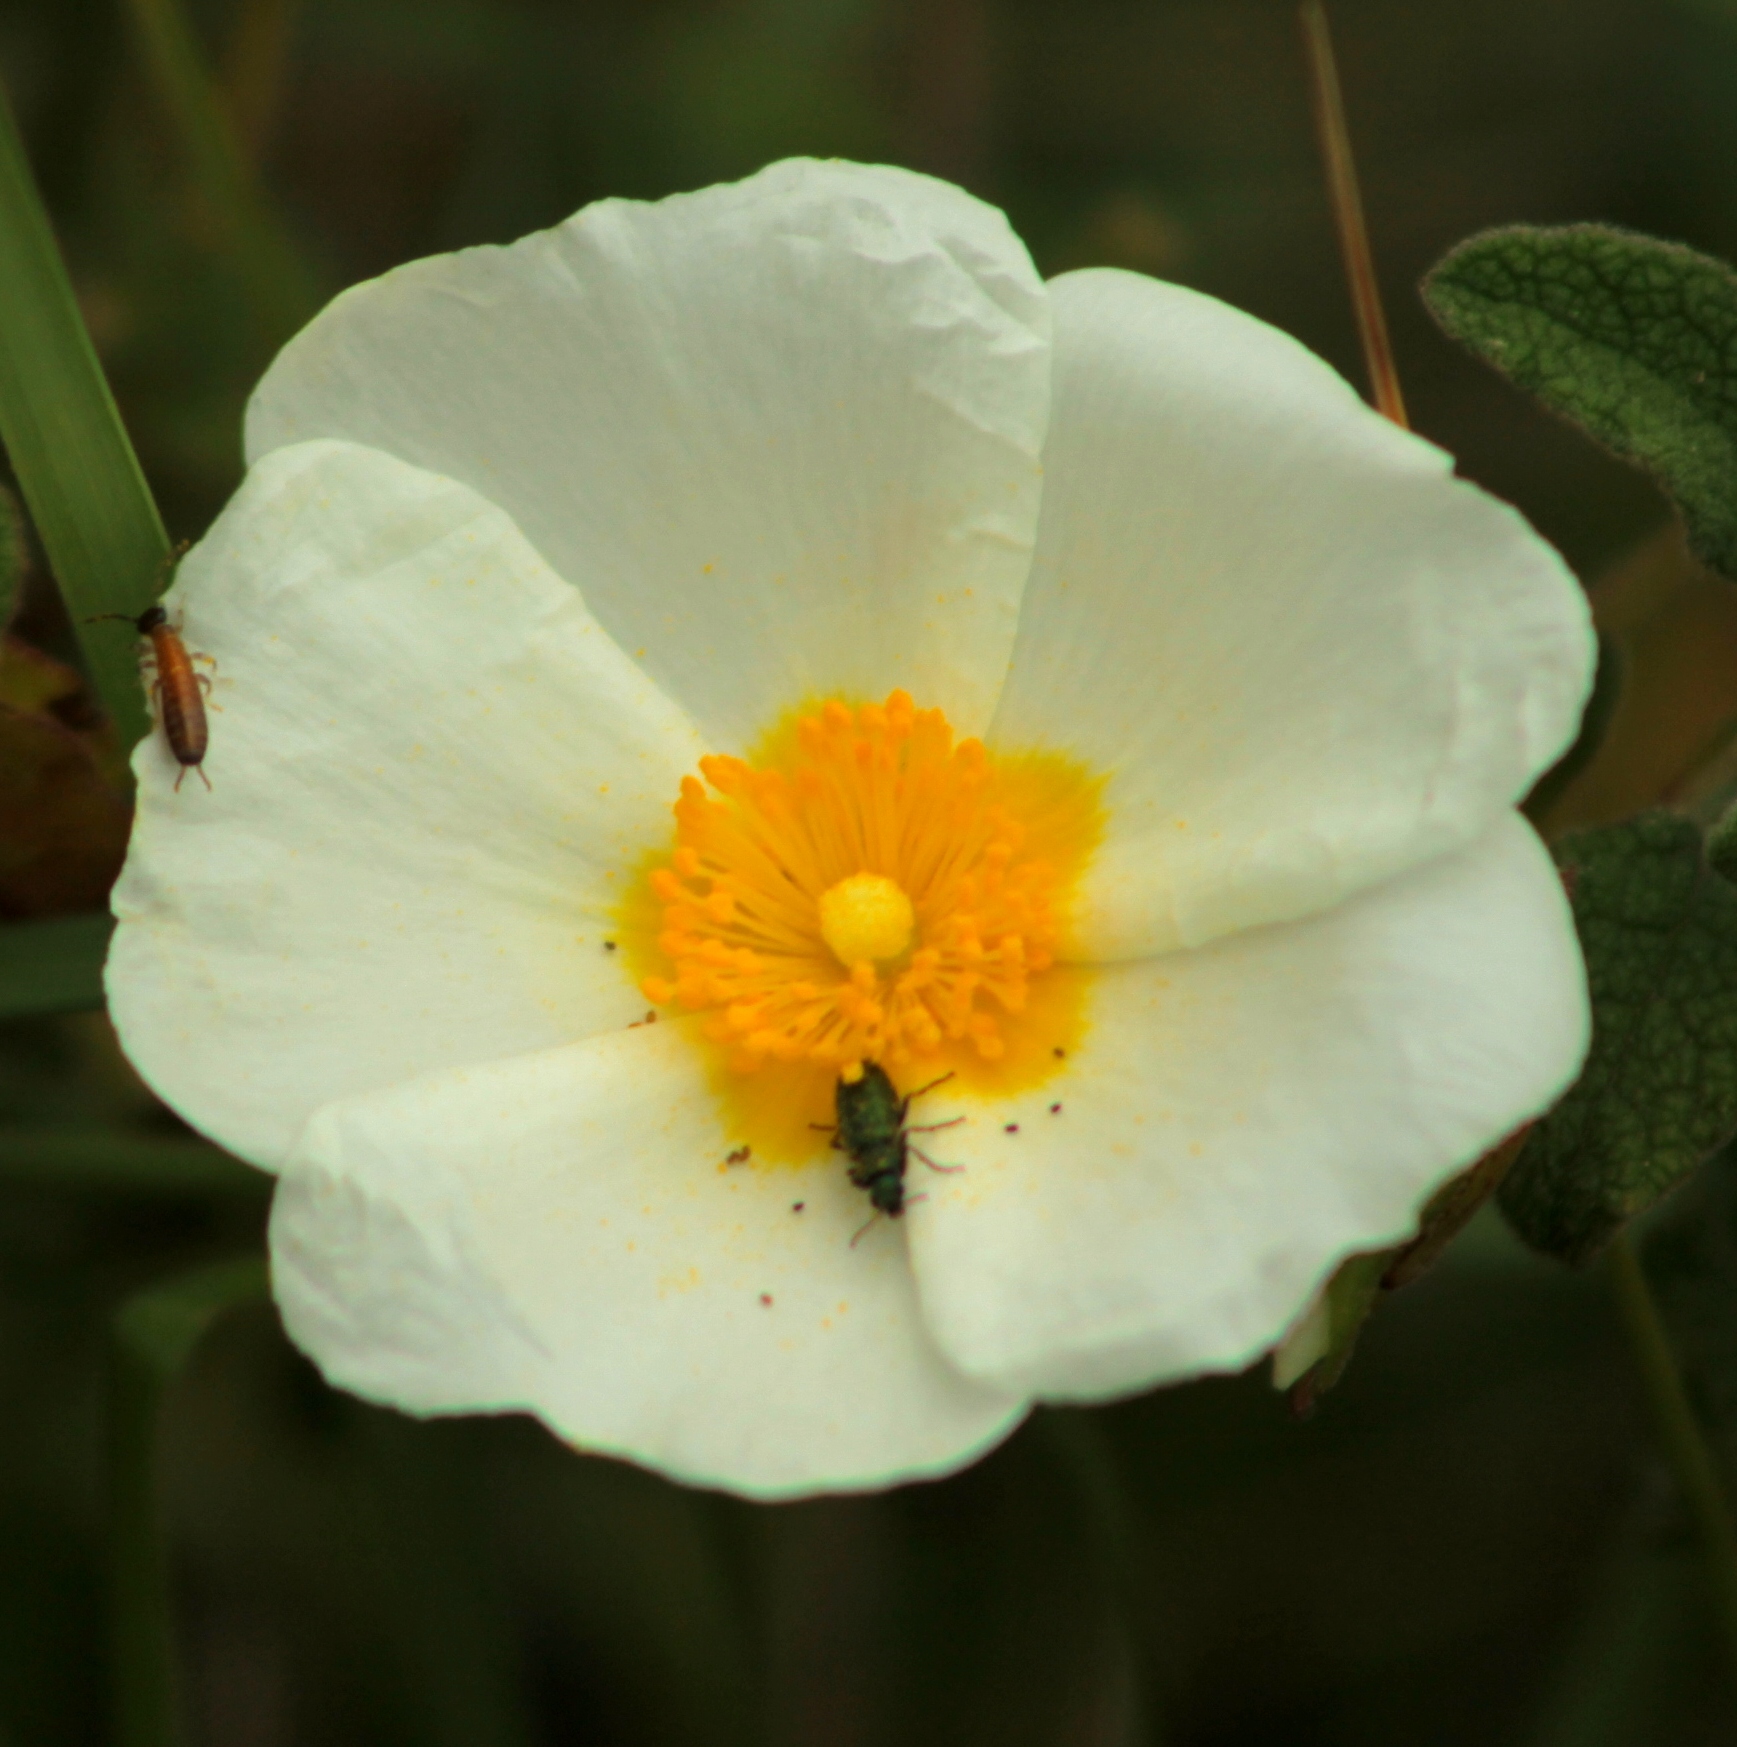* | *Diplotaxis erucoides*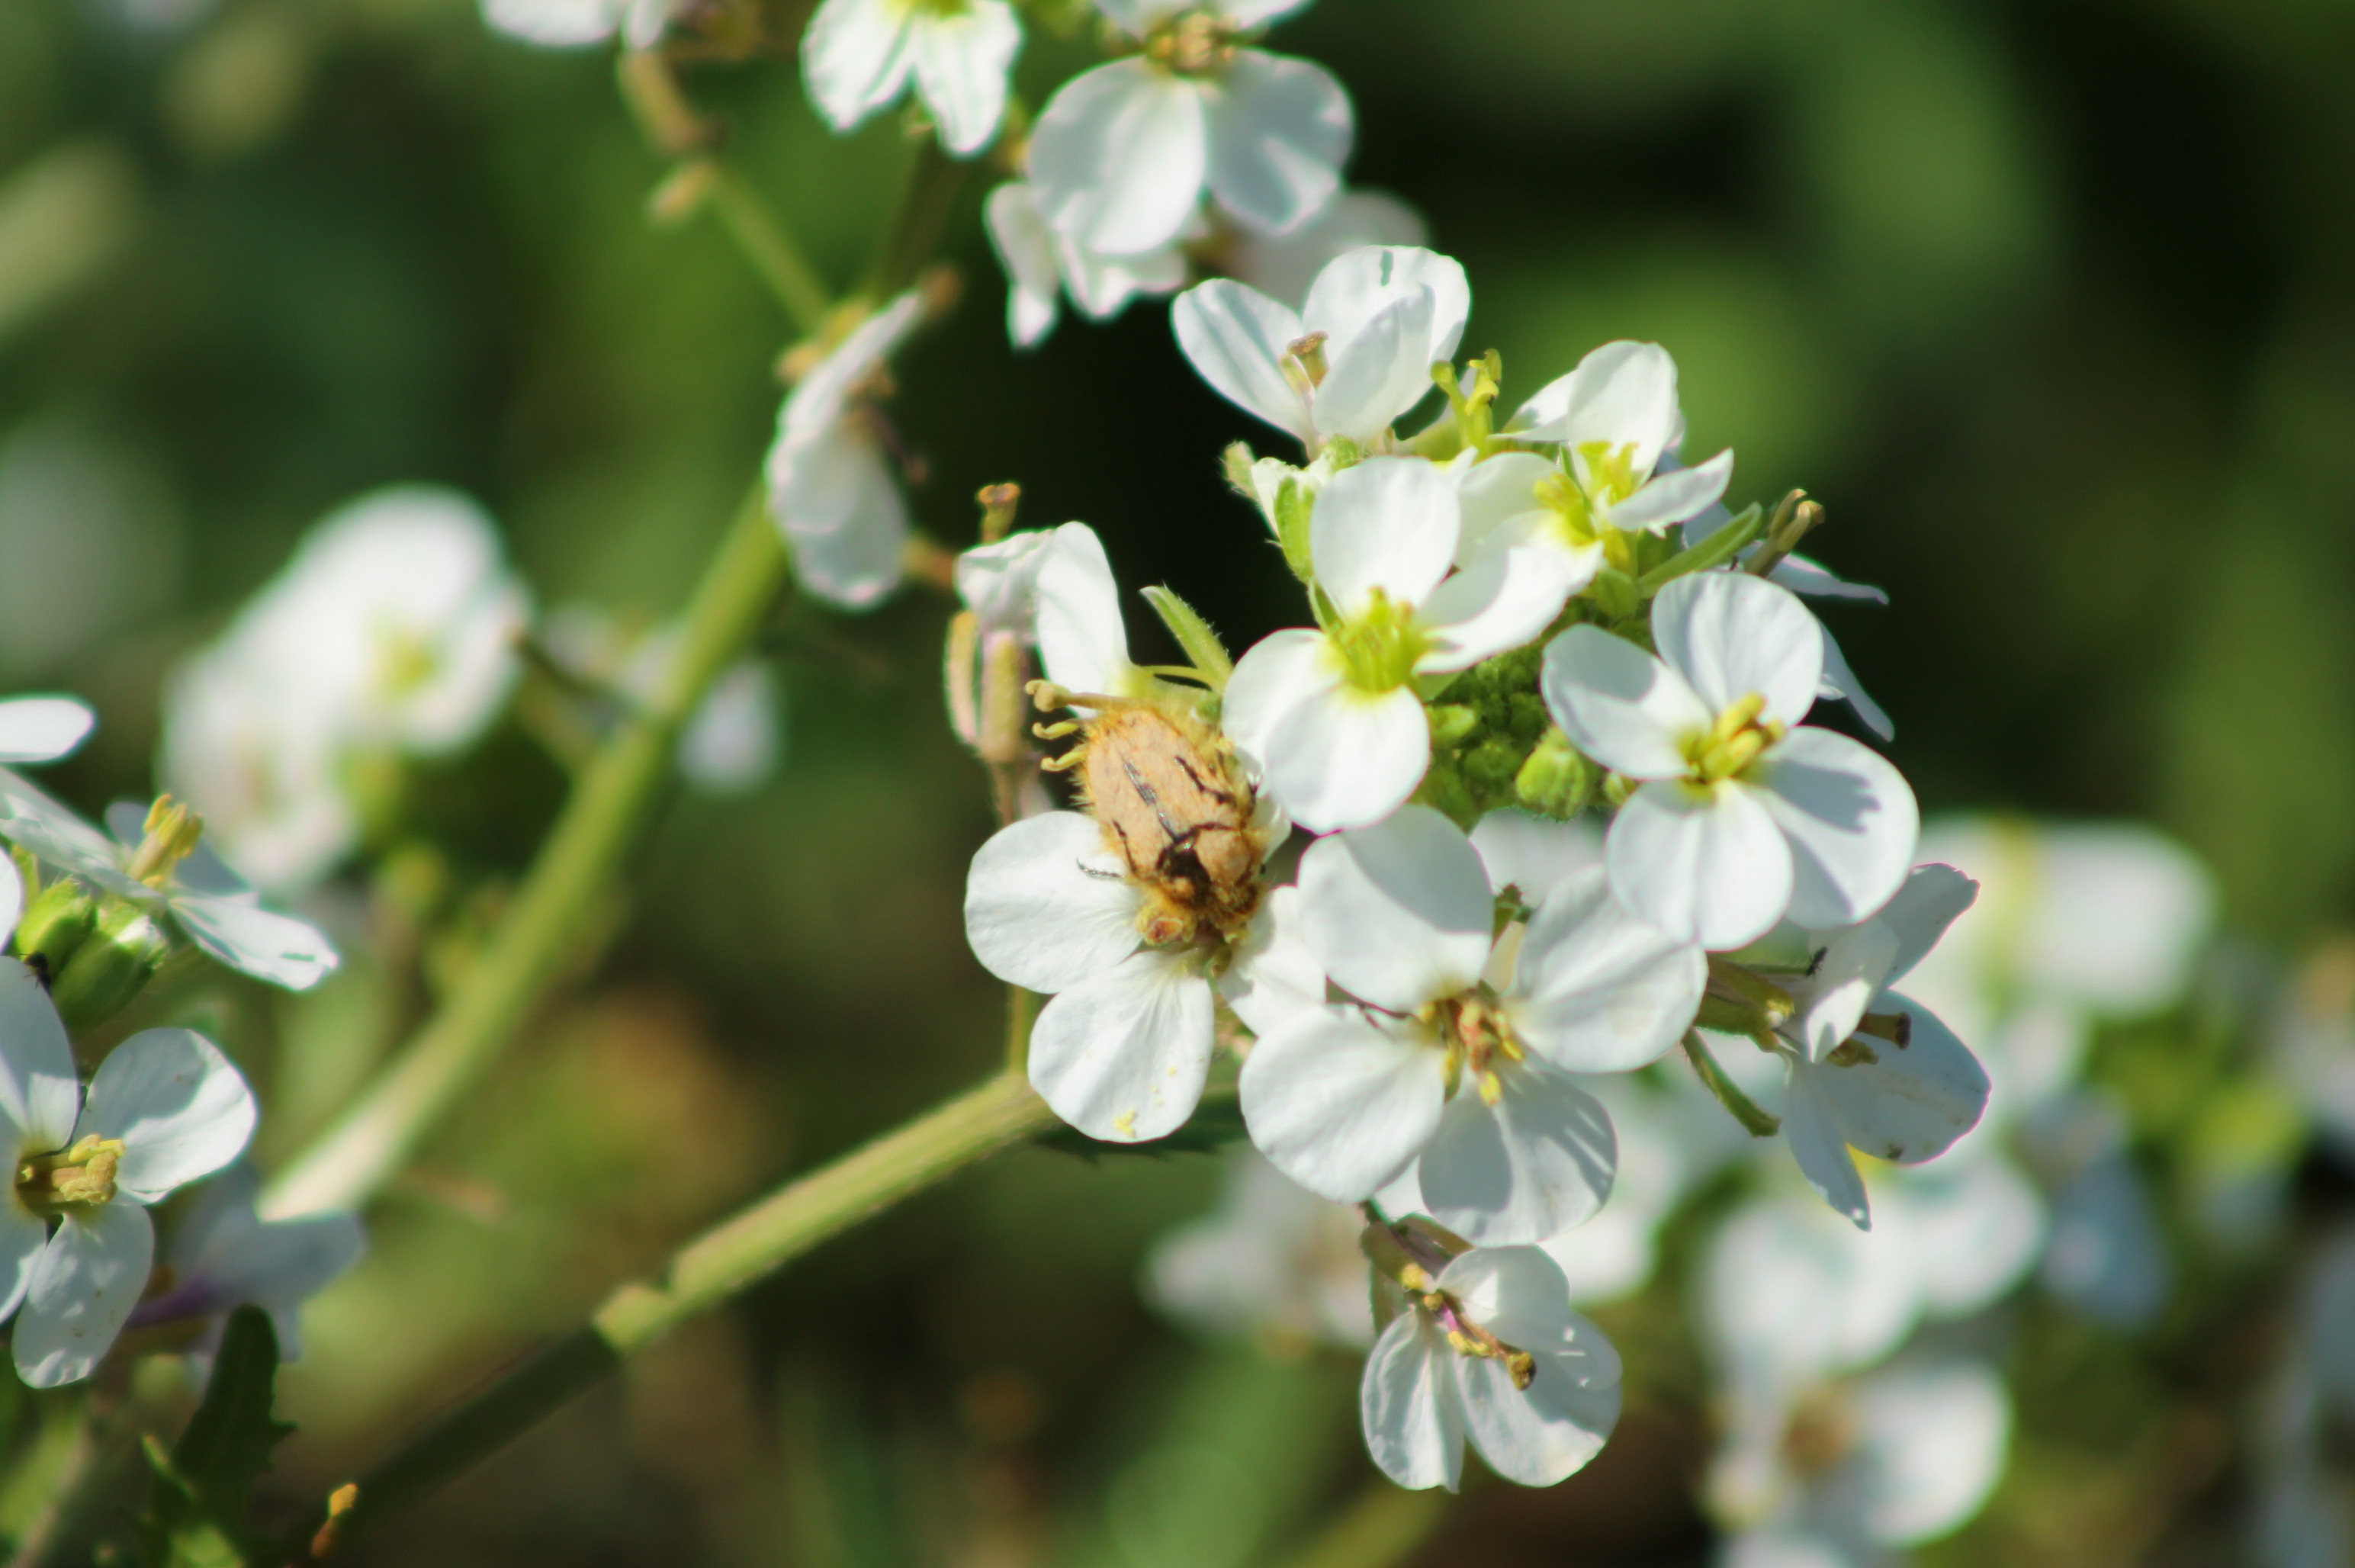 |  | 18% | 22% | 16% | 29% |
| **Lilac-Pink** | *Gladiolus illyricus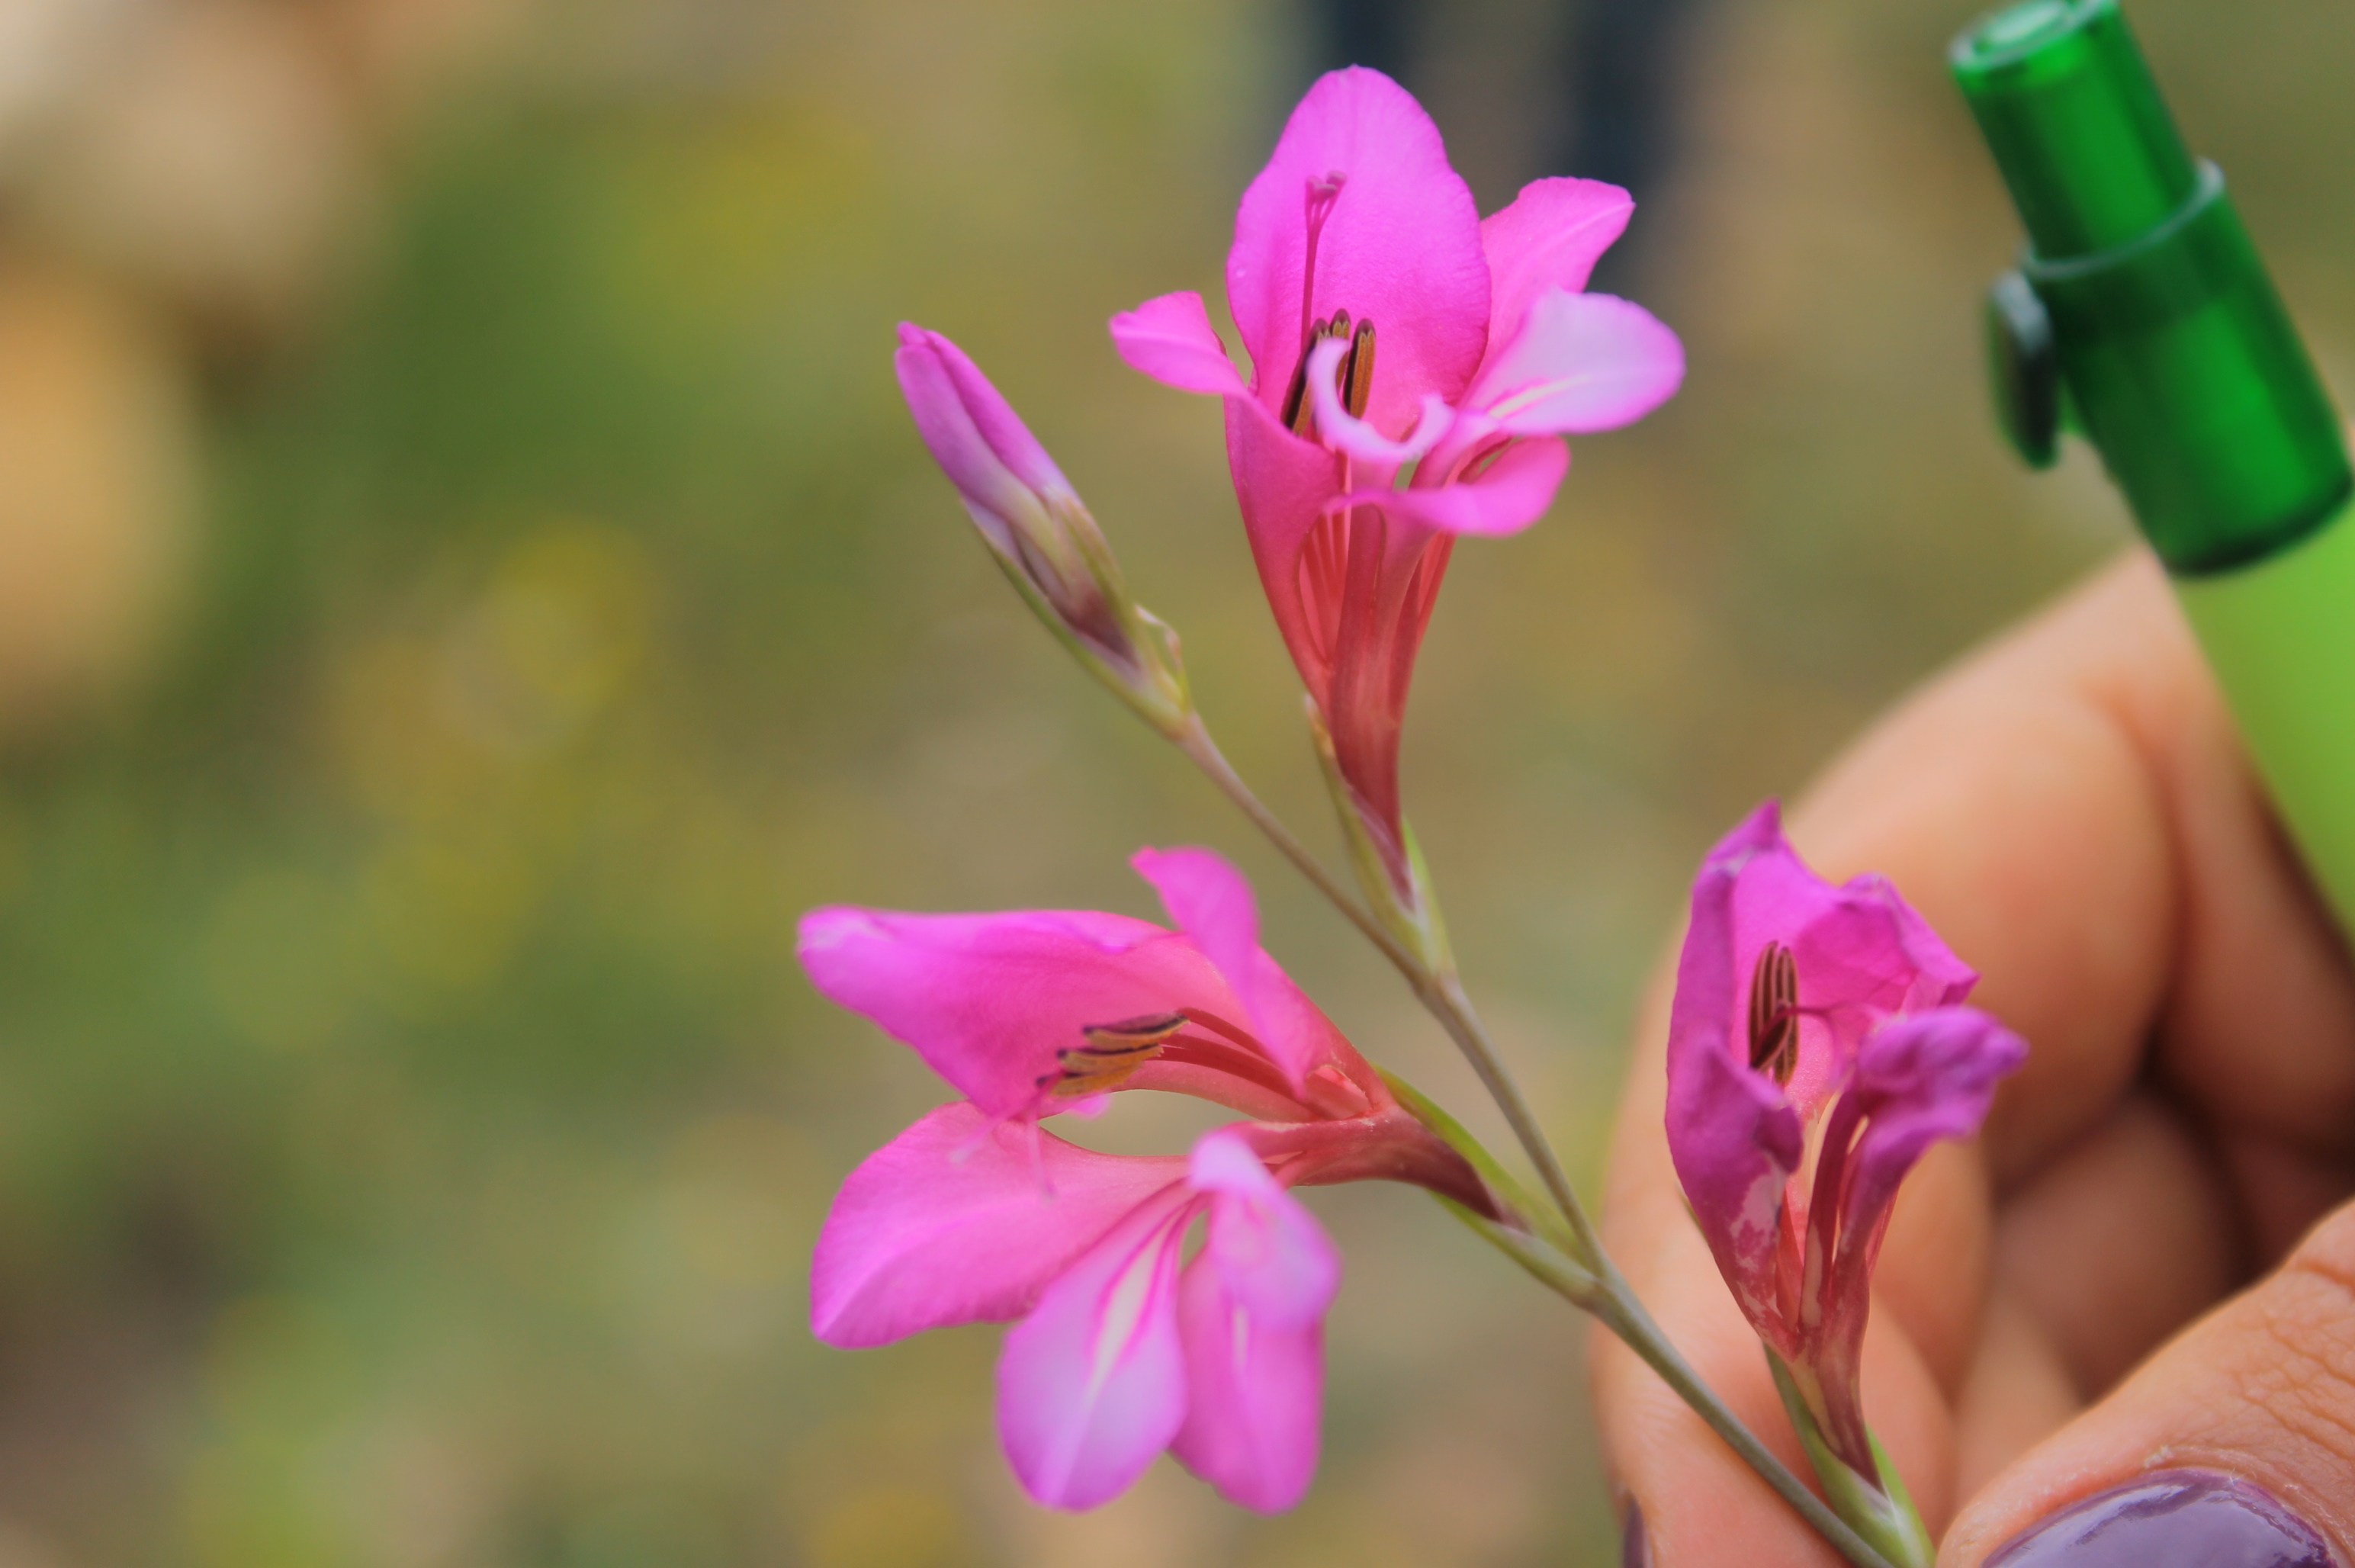* | *Cistus albidus* 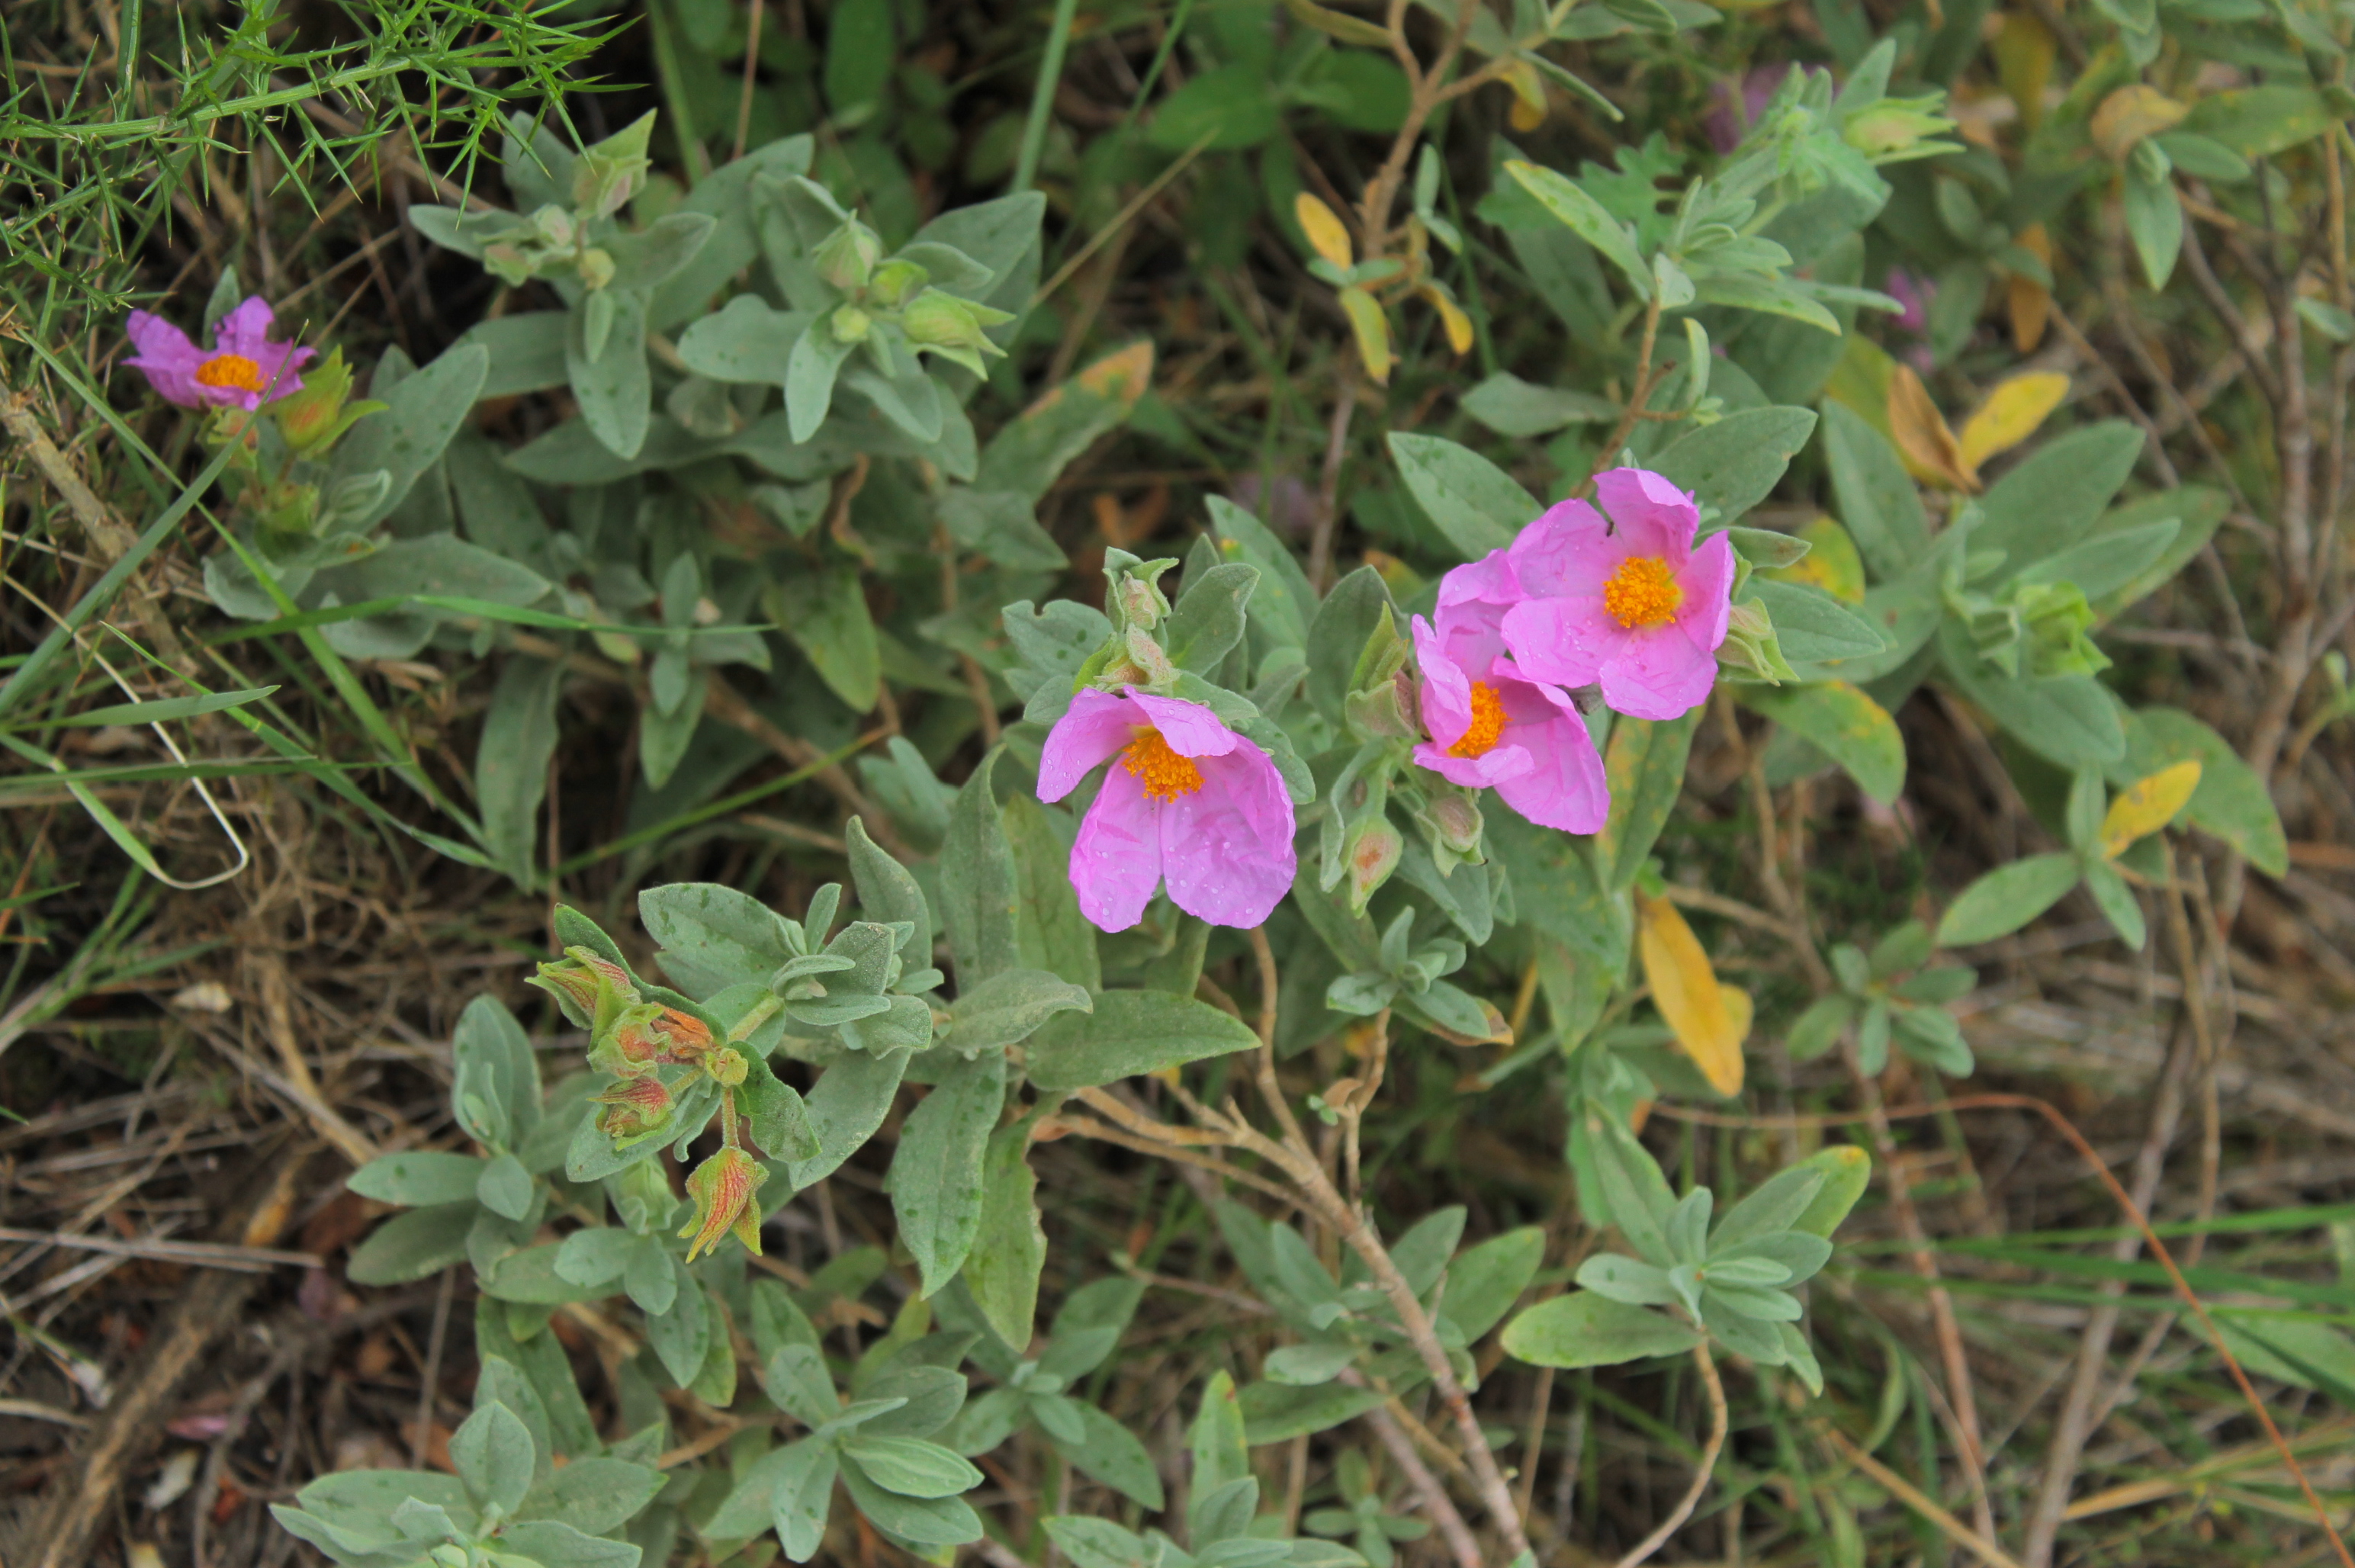 |  | 29% | 30% | 52% | 38% |
| **Green** | *Euphorbia flavicoma 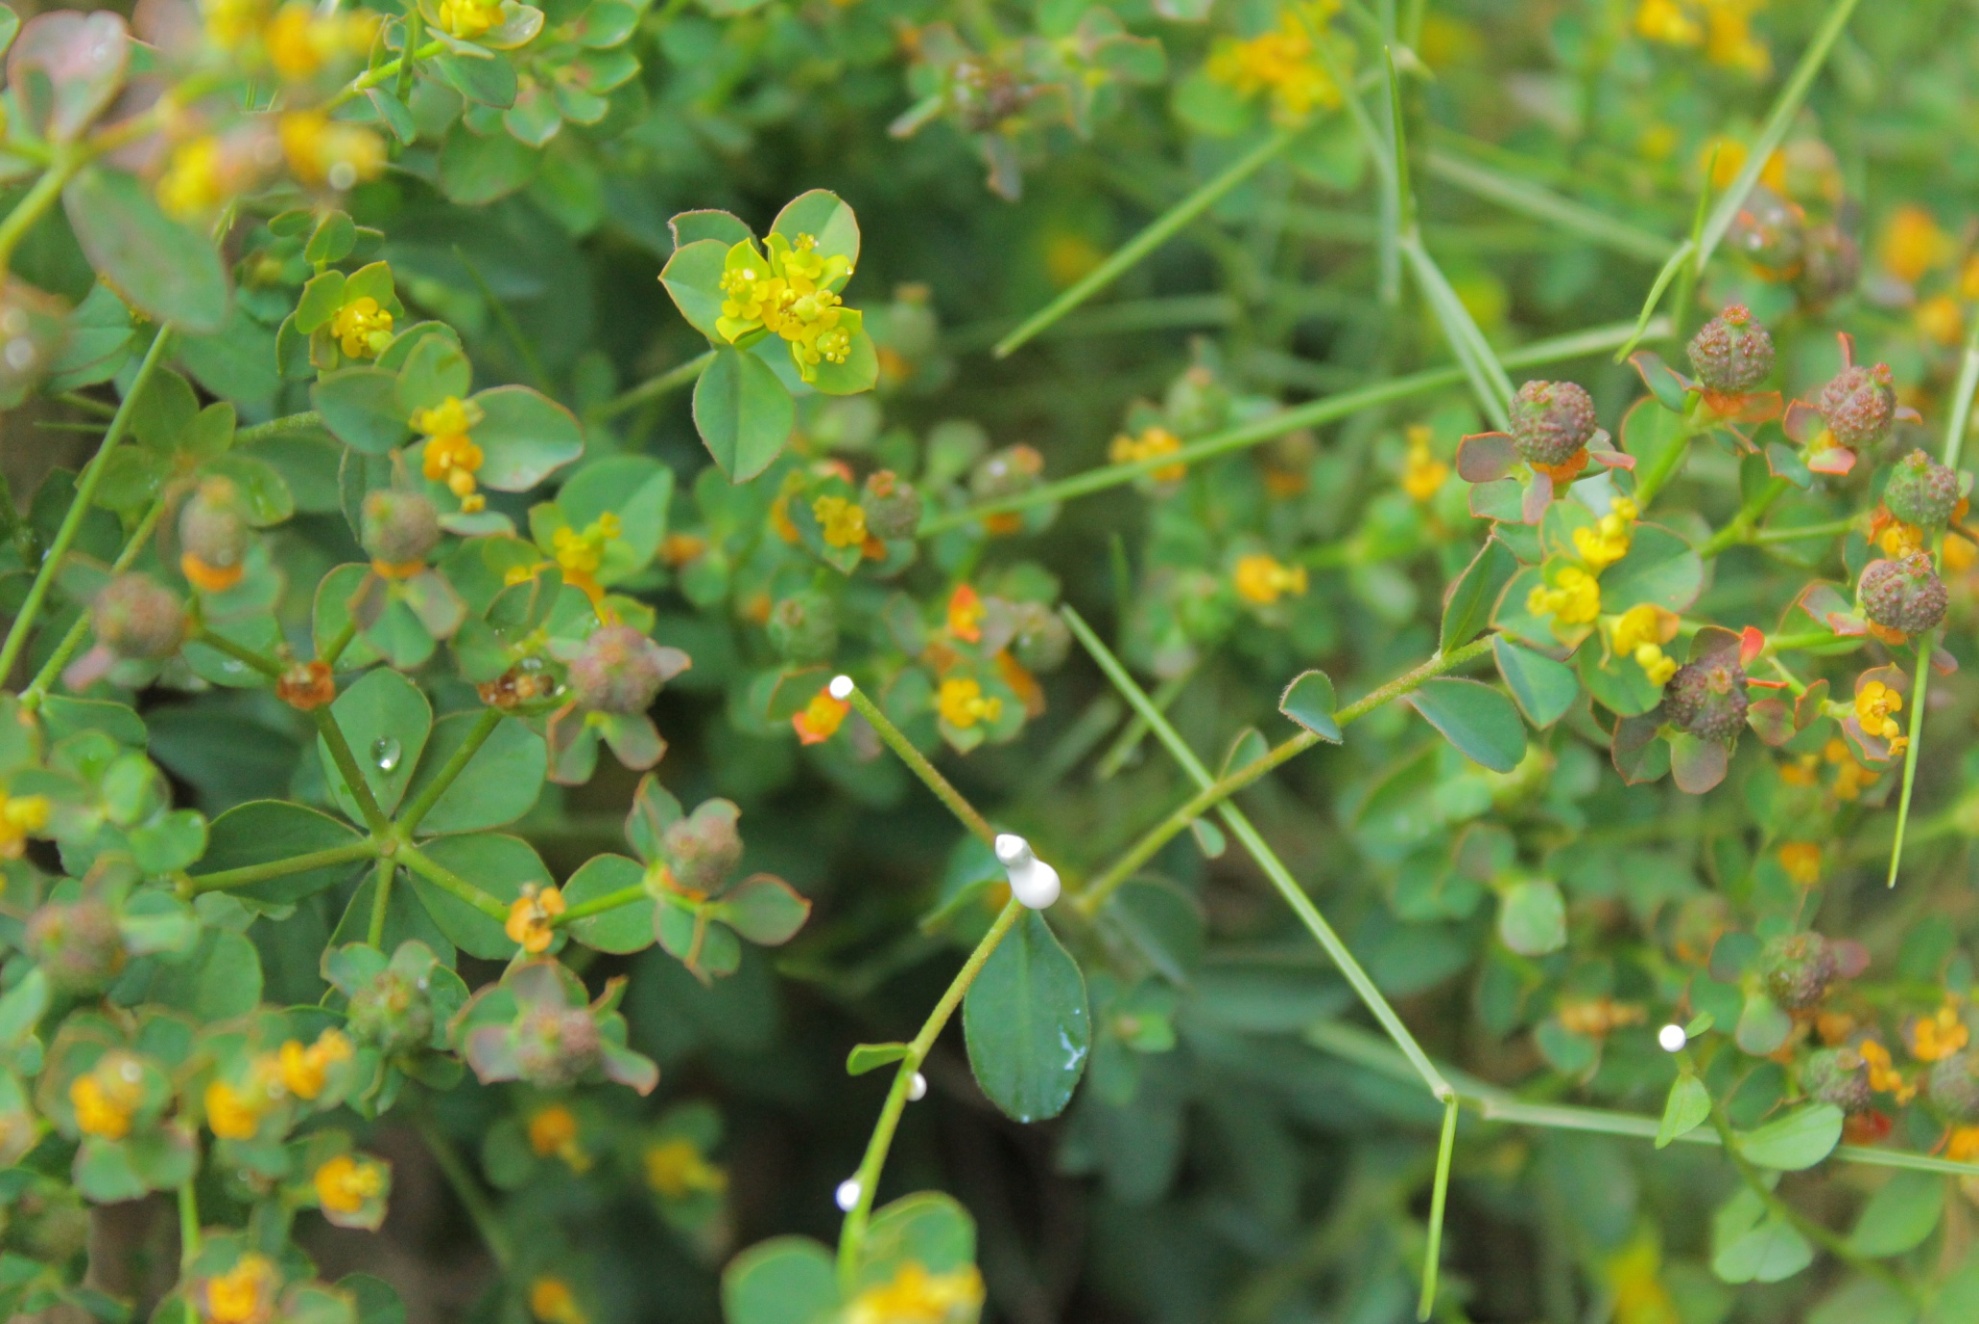* | *Euphorbia serrata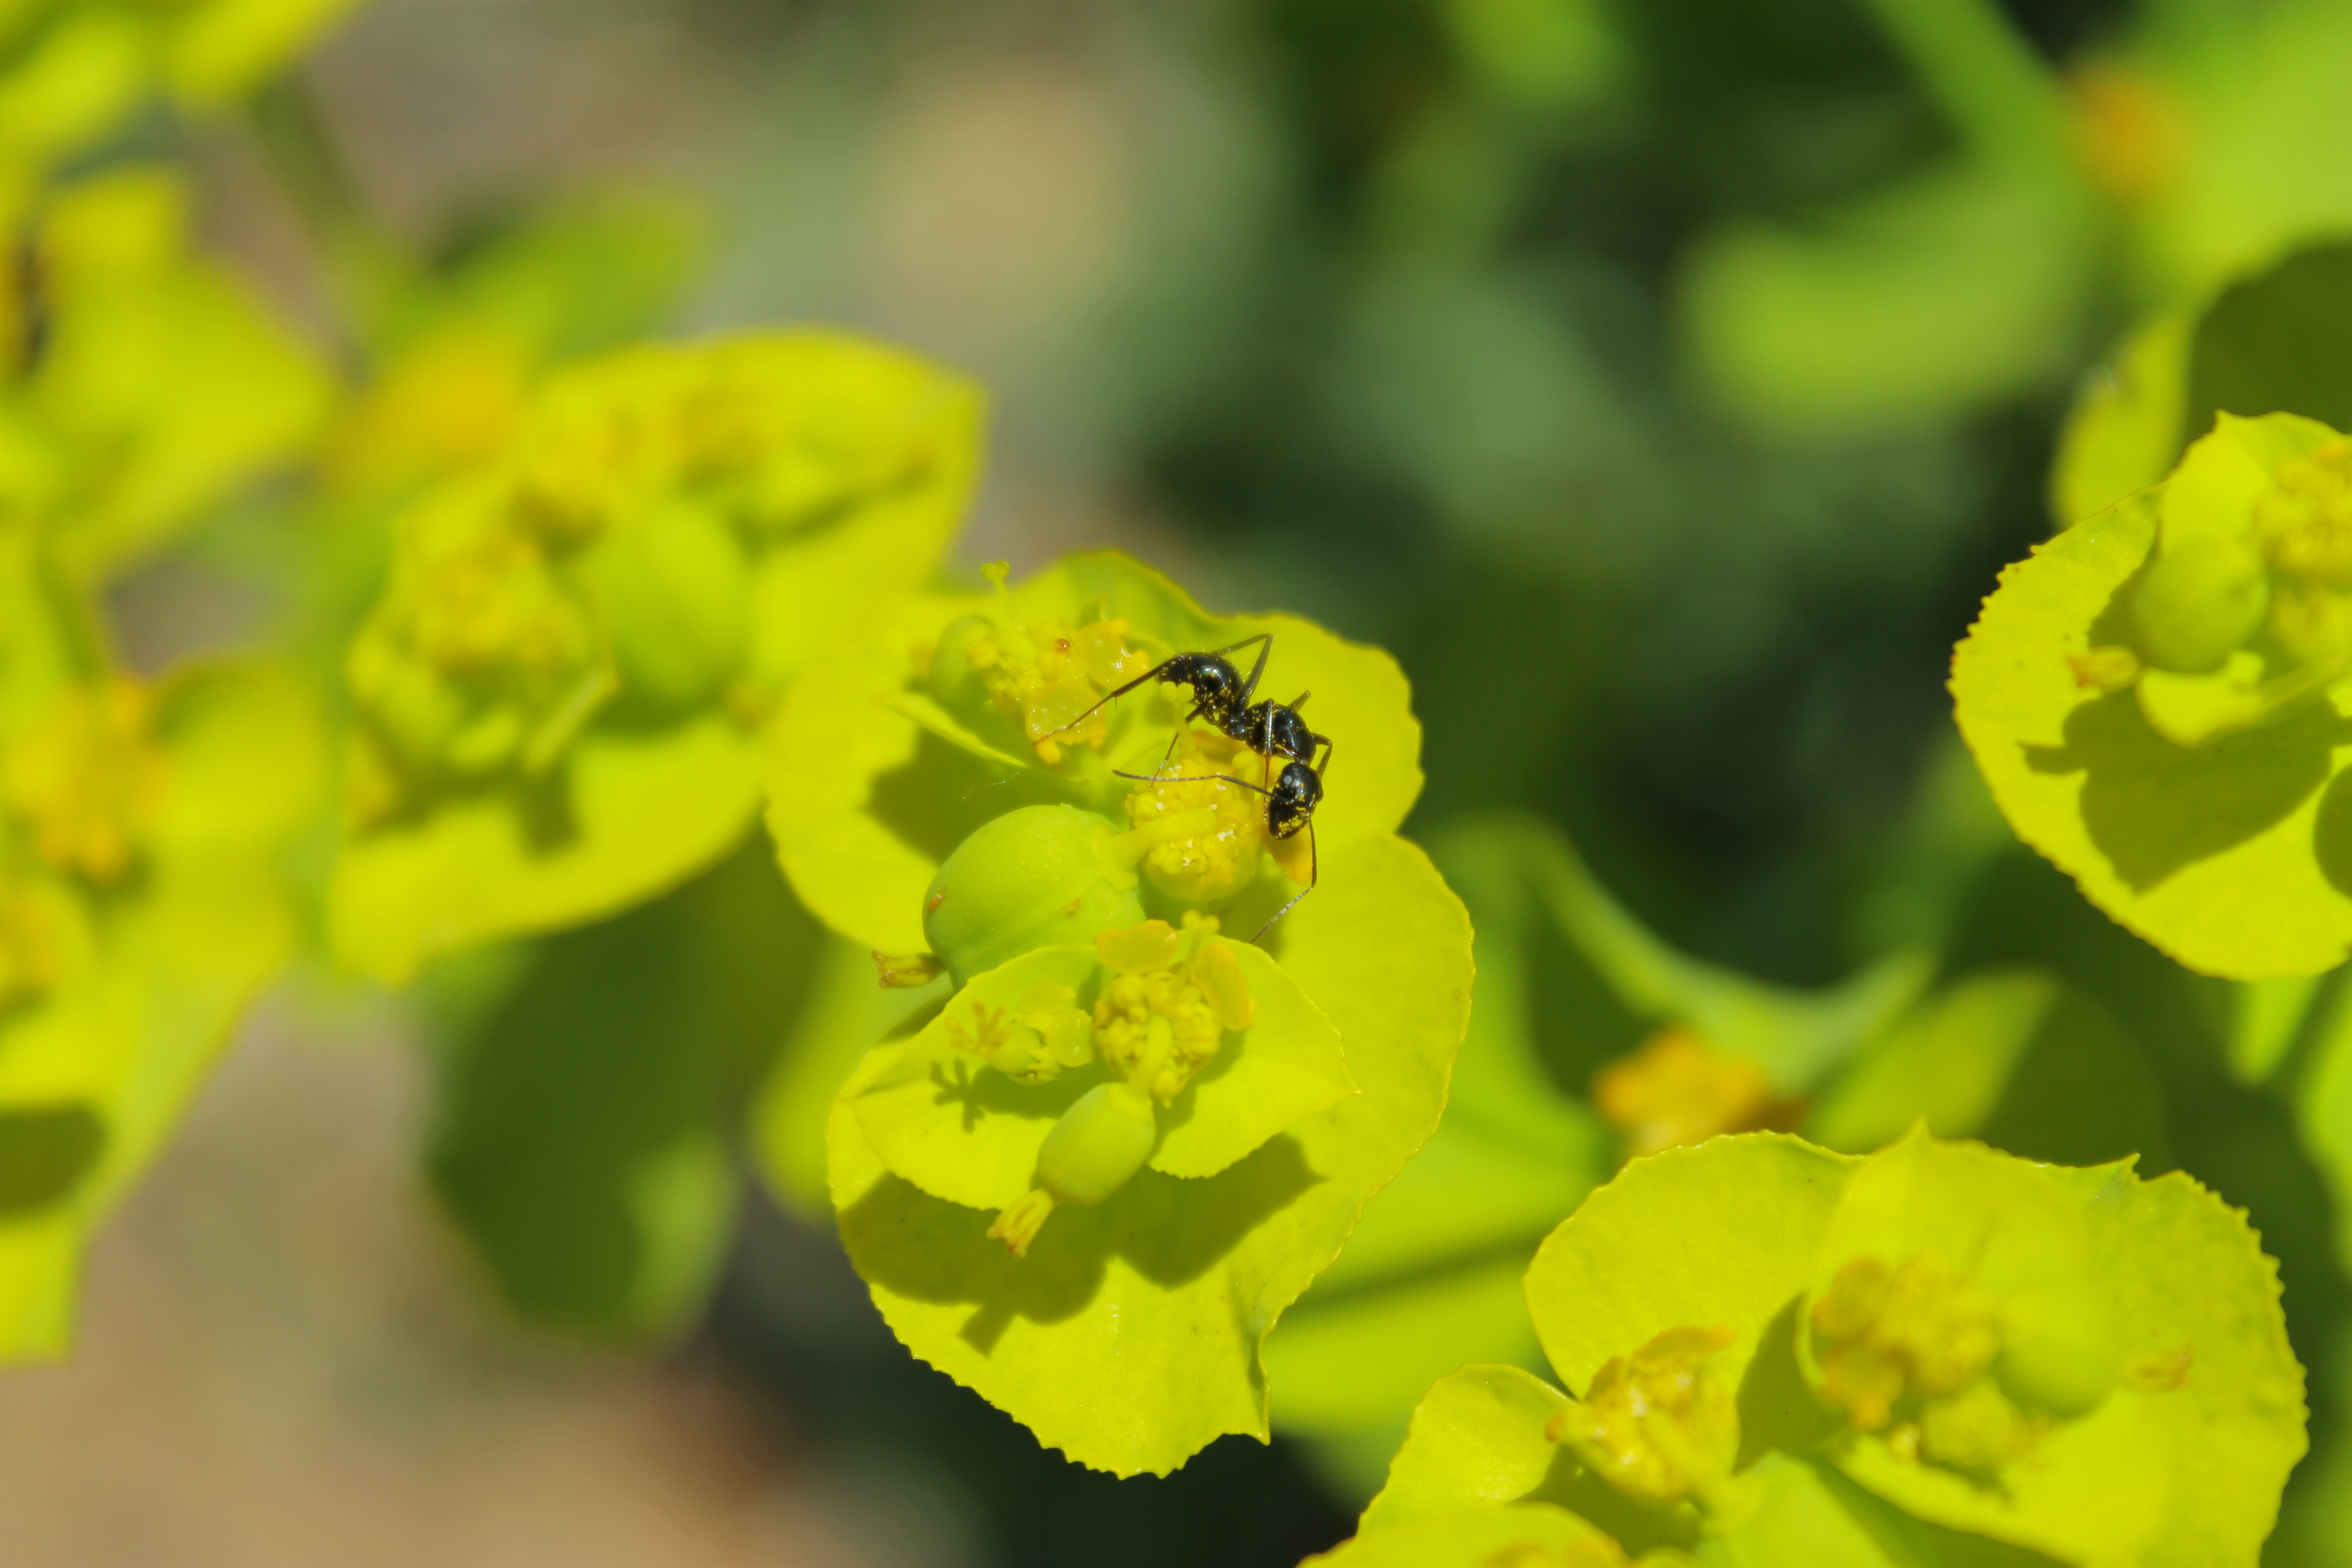* |  | 6% | 4% | 4% | 0% |

**Table S2.** Number (and percentage) of pollinators of each pollinator group surveyed in each of the four communities (CA, CO, GA, PA).

| **Community** | **Bees** | **Ants** | **Wasps** | **Coleopterans** | **Dipterans** | **Lepidopterans** | **Total** |
| --- | --- | --- | --- | --- | --- | --- | --- |
| **CA** | 721 (20.6%) | 1592 (45.4%) | 128 (3.7%) | 831  (23.7%) | 212 (6.0%) | 21  (0.6%) | 3505 |
| **CO** | 9170 (67.1%) | 956 (6.9%) | 173 (1.3%) | 1755  (12.8%) | 1401 (10.2%) | 218  (1.6%) | 13673 |
| **GA** | 2453 (28.3%) | 2066 (23.8%) | 109 (1.3%) | 2845  (32.8%) | 617 (7.1%) | 576  (6.6%) | 8666 |
| **PA** | 3464 (53.6%) | 130 (2.0%) | 413 (6.4%) | 1512  (23.4%) | 621 (9.6%) | 321  (5.0%) | 6461 |
| **Total** | 15808  (48.9%) | 4744  (14.7%) | 823  (2.5%) | 6943  (21.5%) | 2851  (8.8%) | 1136  (3.5%) | 32305 |

|  |  |  |  |  |  |
| --- | --- | --- | --- | --- | --- |

**Table S3.** Mean percentage of visits of each pollinator group to each colour category (data of the four communities lumped together).

| **Colour Category** | **N plant populations** | **Sample Size** | **Bees** | **Ants** | **Wasps** | **Coleopte-rans** | **Dipte-rans** | **Lepidopte-rans** |
| --- | --- | --- | --- | --- | --- | --- | --- | --- |
| **Purple** | 7 | 2414 | 84.8 | 2.2 | 1.2 | 3.5 | 7.3 | 1.0 |
| **UV-red** | 1 | 43 | 14.0 | 0.0 | 7.0 | 79.1 | 0.0 | 0.0 |
| **UV-yellow** | 15 | 3611 | 47.9 | 5.5 | 1.8 | 24.3 | 15.5 | 4.9 |
| **Green** | 7 | 2016 | 27.3 | 21.8 | 5.3 | 11.4 | 33.2 | 1.0 |
| **Yellow** | 12 | 3380 | 43.6 | 24.6 | 3.7 | 17.5 | 10.1 | 0.6 |
| **White-yellow** | 3 | 1308 | 60.8 | 31.1 | 1.1 | 3.3 | 1.9 | 1.8 |
| **White** | 23 | 7175 | 47.7 | 8.6 | 3.1 | 28.1 | 8.1 | 4.3 |
| **Lilac-pink** | 41 | 12358 | 56.1 | 8.3 | 2.0 | 18.8 | 7.5 | 7.3 |
